# Supplementary material
Source: PubMed Central journal article supplement (PMC6839913)
Supplement: NIHMS1057466-supplement-Supporting_Information.pdf [file NIHMS1057466-supplement-Supporting_Information.pdf]

# Supporting Information

## DFT Fe<sub>a3</sub>-O/O-O Vibrational Frequency Calculations over Catalytic Reaction Cycle States in the Dinuclear Center of Cytochrome *c* Oxidase

Wen-Ge Han Du,<sup>†</sup> Andreas W. Götz,<sup>‡</sup> and Louis Noodleman<sup>†,\*</sup>

<sup>†</sup> Department of Integrative Structural and Computational Biology, The Scripps Research Institute, 10550 North Torrey Pines Road, La Jolla, CA 92037.

<sup>‡</sup> San Diego Supercomputer Center, University of California San Diego, 9500 Gilman Drive MC0505, La Jolla, CA 92093.

\*To whom correspondence should be addressed.  
E-mail: lou@scripps.edu.

## Detailed Calculation Methods

The starting geometries of the model clusters for the DNC intermediate states are established based on the  $ba_3$  CcO X-ray crystal structure 3S8G.<sup>1</sup> The calculation method for geometry optimizations using ADF<sup>2-4</sup> is the same (OLYP-D3-BJ<sup>5</sup>/TZP/DZP plus COSMO<sup>6-9</sup> solvation model) as in our recent publication of Ref. 10, and the geometry optimized structures of states **PR**( $\text{Fe}_{a_3}^{4+}=\text{O}^{2-}\cdots\text{HO}^--\text{Cu}_B^{2+}$ , Tyr-O<sup>-</sup>), **F**( $\text{Fe}_{a_3}^{4+}=\text{O}^{2-}\cdots\text{H}_2\text{O}-\text{Cu}_B^{2+}$ , Tyr-O<sup>-</sup>), **FH**( $\text{Fe}_{a_3}^{4+}=\text{O}^{2-}\cdots\text{Cu}_B^{2+}$ , Tyr-O<sup>-</sup>), and **OH**[ $\text{Fe}_{a_3}^{3+}-\text{OH}^--\text{Cu}_B^{2+}$ , Tyr-O<sup>-</sup>] are directly taken from Ref. 10 for vibrational frequency calculations in the current paper.

In Ref. 10, the structures for states **PR**, **F**, **FH**, and **OH** were labeled as  $\text{Fe}_{a_3}^{4+}=\text{O}^{2-}\cdots\text{HO}^--\text{Cu}_B^{2+}-\text{Y237}^--\text{H376}^+-\text{M1}$  (**M1**, **M2**, and **M3** stand for Models **1**, **2**, and **3** in Ref. 10),  $\text{Fe}_{a_3}^{4+}=\text{O}^{2-}\cdots\text{H}_2\text{O}-\text{Cu}_B^{2+}-\text{Y237}^--\text{H376}^+-\text{M2}$ ,  $\text{Fe}_{a_3}^{4+}=\text{O}^{2-}\cdots\text{Cu}_B^{2+}-\text{Y237}^--\text{H376}^+-\text{M3}$ , and  $\text{Fe}_{a_3}^{3+}-\text{OH}^--\text{Cu}_B^{2+}-\text{Y237}^--\text{H376}^+$ , respectively. Our DNC models (see Figure 3) include  $\text{Fe}_{a_3}$ ,  $\text{Cu}_B$ , the following residue side chains or part of the residues: His384, His233, His282, His283, Tyr237, Gly232, Arg449, His376, and Asp372, and seven water molecules found in the X-ray crystal structure, which are near (HOH604 and 608) or on the top (HOH583, 589, 607, 609, and 610) of the DNC. The  $\text{C}_\alpha$  atoms of Tyr237, His282, His283, Asp372, His376, and His384 are each replaced with a link H atom ( $\text{H}_{\text{link}}$ ) along the original  $\text{C}_\beta-\text{C}_\alpha$  direction with the  $\text{C}_\beta-\text{H}_{\text{link}}$  distance 1.09 Å. The  $\text{C}_\gamma$  of Arg449, N of Gly232, C of His233, and  $\text{C}_{228}$  of the geranyl sidechain of the  $a_3$ -heme are also replaced with an  $\text{H}_{\text{link}}$  atom. The geometries of the DNC models are optimized in Broken-symmetry (BS)<sup>11-13</sup> state using Amsterdam Density Functional Package ADF2016.104<sup>2-4</sup> with integration grid accuracy parameter 4.0. All calculations in the current paper and in Ref. 10 are performed using the OLYP functional plus Grimme's latest dispersion corrections (D3-BJ)<sup>5</sup> within the conductor like screening (COSMO) solvation model.<sup>6-9</sup> During DNC geometry optimization calculations,  $\text{H}_{\text{link}}$  atoms on Tyr237, His282, His283, Asp372, His376, His384, and Arg449, and the  $\text{C}_\alpha$  atom of Gly232 are fixed. Since both the cluster and the surrounding protein environment are quite polar and contain many water molecules, to be consistent with Refs. 14, 10, 15, and 16, a large dielectric constant of a simple ketone ( $\epsilon = 18.5$ ) is applied to the environment in all COSMO calculations. The van der Waals radii 1.86, 1.88, 1.70, 1.52, 1.61, and 1.35 Å are used for atoms Fe, Cu, C, O, N, and H, respectively.<sup>14,16</sup> The triple- $\zeta$  plus polarization (TZP) Slater-type basis set is applied to the Fe and Cu atoms and double- $\zeta$  plus polarization (DZP) basis set to other atoms. The inner cores of C(1s), N(1s), O(1s), Fe(1s,2s,2p), and Cu(1s,2s,2p) are treated by frozen core approximation.

For comparison, both analytical and numerical vibrational frequency calculations are then performed at the optimized geometries. Because of the large size of our models, Software for Chemistry & Materials (SCM) provided us a development version of ADF package (ADF2017.206.r59320) for the frequency calculations. However, these modifications very recently have been implemented in the current officially released ADF2019 package. By default, when calculating the vibrational frequencies, the derivatives of the energy with respect to all nuclei are calculated. This gives a complete Hessian (second derivative) matrix, from which the vibrational frequencies of the molecule can be calculated. However, calculations of the full spectrum of our DNC models are not practical and unnecessary due to the following reasons: 1) Our DNC models are very large (205-207 atoms, depending on the protonation state of Tyr237 and the presence of oxygen species ( $O_2/O_2^-$ ,  $O_2^{2-}$ ,  $HO_2^-$ ,  $OH^-$ ,  $H_2O$ ) binding to  $Fe_{a3}$  and  $Cu_B$ ); 2) The geometries of the DNC clusters were optimized with constraints (fixed  $H_{link}$  atoms); and 3) currently, we are only interested in the Fe-O/O-O vibrational modes in each state. Therefore, for each DNC intermediate structure, we compute a partial Hessian (~110 atoms) in analytical frequency calculations, in which all the methyl groups and the atoms in the upper cluster (Arg449, His376, Asp372, HOH583, HOH589, HOH607, HOH610, and the shifted waters HOH604 and HOH608 in states **F**, **F<sub>H</sub>**, and **O<sub>H</sub>**) are excluded from Hessian calculations. In numerical frequency calculations, we applied the mobile block Hessian (MBH) approach built in ADF,<sup>17,18</sup> in which the following groups were treated as individual mobile blocks: each methyl group in the model cluster, each residue side chain of Arg449, His376, and Asp372, and each of the water molecules which are also excluded from analytical Hessian calculations mentioned above. In the MBH method, each mobile block (for example, a methyl group or a water molecule) is treated as a rigid block, which moves as a whole and has only six frequencies related to its rigid motions.

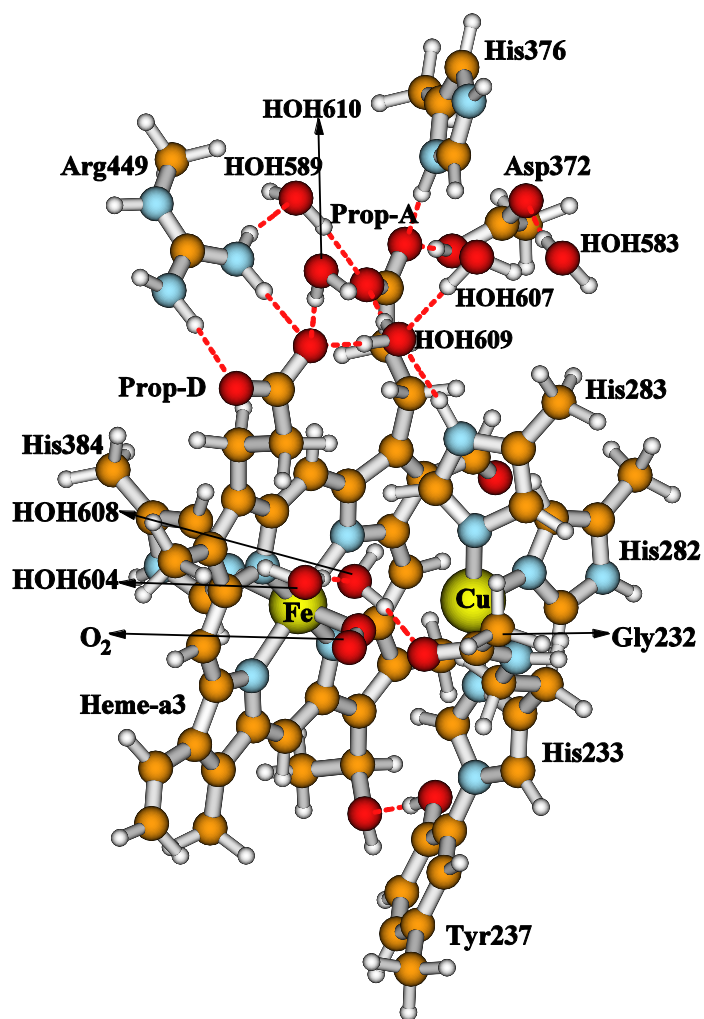

**Figure S1.** A full picture of **Figure 3**, showing all the H atoms. This is our whole quantum cluster model for state **A** of the DNC, built from the X-ray crystal structure 3S8G of  $ba_3$  CcO from *Thermus thermophilus* (*Tt*).<sup>1</sup> A clearer view for both the central  $\text{Fe}_{a_3}{}^{3+}\text{-O}_2^{\bullet-}\cdots\text{Cu}_B^+$  portion and the top cluster of the model are given in **Figure 4**.

## Spin Projection Corrections and Energy Profile Analysis from $\mathbf{A} \rightarrow \mathbf{O}_H$

The broken-symmetry (BS)<sup>11-13</sup> state obtained from DFT calculations is a mixture of pure spin states. To correct the BS-state energies ( $E_{BS}$ ) for spin projection effects, a ferromagnetically-coupled single-point energy calculation was performed on each of the BS-optimized geometries of the 8 states to obtain the F-coupled energies  $E_F$ . When the following Heisenberg Hamiltonian  $H$  (with Heisenberg coupling  $J$ ) is applicable,

$$H = -2JS_1 \cdot S_2 \quad (\text{S1})$$

then the  $J$  coupling constant can be calculated by<sup>19</sup>

$$J = (E_{BS} - E_F) / (\langle S^2 \rangle_F - \langle S^2 \rangle_{BS}) \quad (\text{S2})$$

where  $\langle S^2 \rangle_F$  and  $\langle S^2 \rangle_{BS}$  are the calculated expectation values of the spin squared of the F-coupled and the BS-state, respectively.

The spin projection correction energy to the  $E_{BS}$  is then calculated as

$$\Delta E_{\text{corr}} = xJ \quad (\text{S3})$$

where  $x$  is the measure of spin contamination in the BS state:

$$x = \langle S^2 \rangle_{BS} - S(S + 1) \quad (\text{S4})$$

in which  $S$  is the exact spin of the AF-coupled state. Therefore, the final spin projection corrected AF-state energy is

$$E_0 = E_{BS} + \Delta E_{\text{corr}} \quad (\text{S5})$$

For more accurate calculations, both BS and F-coupled high-spin state geometries need to be optimized. The structure with the minimum  $E_0$  can be obtained by extrapolating the geometries between the optimized BS and F-coupled geometries.

In Table S1, we have listed all the calculated values of  $E_{BS}$ ,  $\langle S^2 \rangle_{BS}$ ,  $E_F$ ,  $\langle S^2 \rangle_F$ ,  $J$ ,  $\Delta E_{\text{corr}}$ ,  $E_0$ , and  $\Delta E_0$  for the eight DNC states studied here.

We also comment on the effect of spin projection on the wave function and, therefore, on the spin density distribution. There is a significant difference here between the spin density in a pure spin state, and that in the corresponding BS state. The largest difference occurs for states where the true total spin quantum number is  $S = 0$ . For  $S = 0$ , the corresponding spin density must be zero everywhere. This is in sharp contrast to the spin density in the related BS state. For two antiferromagnetically spin coupled fragments of equal spin, for example, when  $S_1 = S_2 = 1/2$ , and total  $S = 0$ , the BS state spin density is not zero, but shows regions of opposite spin, summing to  $M_s = 0$  (z component of total spin = 0). In Table 3, this result is seen in the Mulliken spin populations (net spin) for states **A**, **Peroxo**, and **Hydroperoxo**. For **PM**, similarly,  $S_1 = S_2 = 1$ , total  $S$  for the ground state is  $S = 0$ , but with a non-zero spin density in the BS state. However, in the true  $S = 0$  states of these systems, there is still an effective separation between electrons of opposite spin, as is well known in the electronic wave function of diradicals.<sup>20</sup> For states **PR**, **F**, and **FH**, the spin coupled states have composition  $S_1 = 1$ ,  $S_2 = 1/2$ , total  $S = 1/2$ . For state **OH**, the spin coupled state is composed from  $S_1 = 5/2$ ,  $S_2 = 1/2$ , total  $S = 2$ . In all these cases, where  $S$  is not equal to zero, the effect of spin coupling to attain a pure spin state allows for nonzero spin density throughout the molecule, and opposite but non-equal net spins (see Table 3, main text). However, these spin densities in the pure spin states are less than those in the corresponding BS states in accordance with the Wigner Eckart theorem (to first order).<sup>21,22</sup>

Further, we have also estimated the free energy changes ( $\Delta G$ ) (see Table S1 and Figure 5 in the main text) at pH = 7 along the **A**  $\rightarrow$  **OH** pathway.

The **A**  $\rightarrow$  **Peroxo** state energy is  $-26.5 \text{ kcal mol}^{-1}$ . This strong binding energy is the result of an internal electron transfer from  $\text{Cu}_B^+$  to  $\text{O}_2^{\bullet}$  radical, combined with formation of a  $\text{O}_2^{2-}$  bond to  $\text{Cu}_B^{2+}$ . In the subsequent internal proton transfer from Tyr237-OH to the metal bridging peroxide, **Peroxo**  $\rightarrow$  **Hydroperoxo**, the calculated energy difference is  $+13.4 \text{ kcal mol}^{-1}$  (we have estimated the zero-point energy (ZPE) difference for proton transfer from Tyr237 to the metal bridging peroxide as

$-0.5 \text{ kcal mol}^{-1}$  by calculating the ZPE's of the simple  $\text{HOO}^-$ ,  $\text{H}_2\text{O}_2$ , neutral and deprotonated Tyr-OH/Tyr-O $^-$  molecules. The predicted energy cost for the required formation of the Hydroperoxo is larger than found in our earlier work ( $+7.3 \text{ kcal mol}^{-1}$  with an OLYP potential, with no dispersion, or  $+6.5 \text{ kcal mol}^{-1}$  including a small spin projection correction<sup>23</sup>). The following **Hydroperoxo**  $\rightarrow$  **P<sub>M</sub>** transition involves cleavage of the O-O bond, and changes in the Fe<sub>a3</sub> and Cu<sub>B</sub> oxidation states, as well as generating the Tyr radical. The calculated energy change is  $-16.2 \text{ kcal mol}^{-1}$ , which is less negative than in our earlier work ( $-18.9 \text{ kcal mol}^{-1}$  with OLYP-D3,<sup>24</sup> using an earlier form of the dispersion correction). With OLYP-D3-BJ, the calculated redox potential for the one electron redox process, **P<sub>M</sub>** +  $1e^- \rightarrow$  **P<sub>R</sub>** can be computed from the equation:  $E^0 = (E_{\text{ox}} - E_{\text{red}}) + \Delta E(\text{SHE})$ , where the experimental standard hydrogen electrode (SHE) energy is  $-4.34 \text{ V}$ , equivalent to  $-100.1 \text{ kcal mol}^{-1}$  per electron<sup>23</sup> (also see the Supporting Information of Ref. 10). The predicted redox potential with respect to SHE is  $E^0 = +0.052 \text{ V}$ . This is less positive than a typical cytochrome *c* redox potential, about  $+0.22 \text{ V}$  referred to SHE, so the predicted  $\Delta E^0$  (cytc reference) =  $-0.17 \text{ V}$ , or  $\Delta G = +3.9 \text{ kcal mol}^{-1}$ . Compared to our earlier work, some relative energies are altered with the OLYP-D3-BJ potential, but the energy differences between intermediates over this part of the reaction path does not show any large barriers. Beyond **P<sub>R</sub>**, from **P<sub>R</sub>**  $\rightarrow$  **F**  $\rightarrow$  **F<sub>H</sub>**  $\rightarrow$  **O<sub>H</sub>**, the energies and pathways are summarized and discussed in Ref. 10. Here we only made the minor  $\Delta E_{\text{corr}}$  corrections for those values.

**Table S1. Properties Related to Correcting the Broken-Symmetry (BS) State Energies.<sup>a</sup>**

| State                | $E_{\text{BS}}$ | $\langle S^2 \rangle_{\text{BS}}$ | $E_{\text{F}}$ | $\langle S^2 \rangle_{\text{F}}$ | $J$  | $\Delta E_{\text{corr}}$ | $E_0$    | $\Delta E_0$ | $\Delta G$ |
|----------------------|-----------------|-----------------------------------|----------------|----------------------------------|------|--------------------------|----------|--------------|------------|
| <b>A</b>             | -28712.3        | 0.6635                            | -28708.8       | 2.0423                           | -2.5 | -1.7                     | -28714.0 | 0.0          | 0.0        |
| <b>Peroxo</b>        | -28738.4        | 0.5896                            | -28733.4       | 2.0310                           | -3.5 | -2.1                     | -28740.5 | -26.5        | -26.5      |
| <b>Hydroperoxo</b>   | -28726.6        | 0.9649                            | -28726.6       | 2.0231                           | 0.0  | 0.0                      | -28726.6 | -12.6        | -13.1      |
| <b>P<sub>M</sub></b> | -28742.7        | 2.0058                            | -28742.4       | 6.0342                           | -0.1 | -0.2                     | -28742.9 | -28.9        | -29.3      |
| <b>P<sub>R</sub></b> | -28844.1        | 1.7582                            | -28844.0       | 3.7762                           | -0.1 | -0.1                     | -28844.2 | -130.2       | -25.4      |
| <b>F</b>             | -28853.5        | 1.7732                            | -28853.5       | 3.7784                           | 0.0  | 0.0                      | -28853.5 | -139.5       | -40.2      |
| <b>F<sub>H</sub></b> | -28859.6        | 1.7702                            | -28859.8       | 3.7809                           | 0.1  | 0.1                      | -28859.5 | -145.5       | -46.2      |
| <b>O<sub>H</sub></b> | -28968.8        | 6.8805                            | -28967.0       | 12.0125                          | -0.4 | -0.4                     | -28969.2 | -255.2       | -56.2      |

<sup>a</sup> Energies are in the unit of kcal mol<sup>-1</sup>.  $E_{\text{BS}}$ : the calculated broken-symmetry state energies.  $\langle S^2 \rangle_{\text{BS}}$ : the calculated expectation value of the spin squared of the broken-symmetry state.  $E_{\text{F}}$ : the ferromagnetically-coupled (F-coupled) state energy obtained from a single-point energy calculation on the broken-symmetry state optimized geometry.  $\langle S^2 \rangle_{\text{F}}$ : the calculated expectation value of the spin squared of the F-coupled state.  $J$ : the calculated Heisenberg coupling constant.  $\Delta E_{\text{corr}}$ : the correction for the BS energy.  $E_0$ : the corrected AF-state energy,  $E_0 = E_{\text{BS}} + \Delta E_{\text{corr}}$ .  $\Delta E_0$ : the relative energies of  $E_0$ .  $\Delta G$ : the calculated relative free energies (see Figure 5) at pH = 7 with the corrections of the zero point energy differences ( $\Delta ZPE$ ) and with the reference to a typical cytochrome *c* redox potential of  $E^0 = +0.22$  eV.



## References of Supporting Information

- (1) Tiefenbrunn, T.; Liu, W.; Chen, Y.; Katritch, V.; Stout, C. D.; Fee, J. A.; Cherezov, V. High Resolution Structure of the *ba*<sub>3</sub> Cytochrome *c* Oxidase from *Thermus thermophilus* in a Lipidic Environment. *Plos One* **2011**, *6*, e22348.
- (2) ADF *Amsterdam Density Functional Software*, SCM, Theoretical Chemistry, Vrije Universiteit, Amsterdam, The Netherlands. <http://www.scm.com>.
- (3) te Velde, G.; Bickelhaupt, F. M.; Baerends, E. J.; Guerra, C. F.; Van Gisbergen, S. J. A.; Snijders, J. G.; Ziegler, T. Chemistry with ADF. *J. Comput. Chem.* **2001**, *22*, 931-967.
- (4) Guerra, C. F.; Visser, O.; Snijders, J. G.; te Velde, G.; Baerends, E. J., Parallelisation of the Amsterdam Density Functional Program. In *Methods and techniques for computational chemistry*, Clementi, E.; Corongiu, C., Eds. STEF: Cagliari, 1995; pp 303-395.
- (5) Grimme, S.; Ehrlich, S.; Goerigk, L. Effect of the Damping Function in Dispersion Corrected Density Functional Theory. *J. Comput. Chem.* **2011**, *32*, 1456-1465.
- (6) Klamt, A.; Schüürmann, G. COSMO - A New Approach to Dielectric Screening in Solvents with Explicit Expressions for the Screening Energy and Its Gradient. *J. Chem. Soc., Perkin Trans. 2* **1993**, 799-805.
- (7) Klamt, A. Conductor-Like Screening Model for Real Solvents - A New Approach to the Quantitative Calculation of Solvation Phenomena. *J. Phys. Chem.* **1995**, *99*, 2224-2235.
- (8) Klamt, A.; Jonas, V. Treatment of the Outlying Charge in Continuum Solvation Models. *J. Chem. Phys.* **1996**, *105*, 9972-9981.
- (9) Pye, C. C.; Ziegler, T. An Implementation of the Conductor-Like Screening Model of Solvation within the Amsterdam Density Functional Package. *Theor. Chem. Acc.* **1999**, *101*, 396-408.
- (10) Han Du, W.-G.; Götz, A. W.; Noodleman, L. A Water Dimer Shift Activates a Proton Pumping Pathway in the **PR** → **F** Transition of *ba*<sub>3</sub> Cytochrome *c* Oxidase. *Inorg. Chem.* **2018**, *57*, 1048-1059.
- (11) Noodleman, L. Valence Bond Description of Anti-Ferromagnetic Coupling in Transition-Metal Dimers. *J. Chem. Phys.* **1981**, *74*, 5737-5743.
- (12) Noodleman, L.; Case, D. A. Density-Functional Theory of Spin Polarization and Spin Coupling in Iron-Sulfur Clusters. *Adv. Inorg. Chem.* **1992**, *38*, 423-470.
- (13) Noodleman, L.; Lovell, T.; Han, W.-G.; Liu, T.; Torres, R. A.; Himo, F., Density Functional Theory. In *Comprehensive Coordination Chemistry II, From Biology to Nanotechnology*, Lever, A. B., Ed. Elsevier Ltd: 2003; Vol. 2, pp 491-510.
- (14) Fee, J. A.; Case, D. A.; Noodleman, L. Toward a Chemical Mechanism of Proton Pumping by the B-Type Cytochrome *c* Oxidases: Application of Density Functional Theory to Cytochrome *ba*<sub>3</sub> of *Thermus thermophilus*. *J. Am. Chem. Soc.* **2008**, *130*, 15002-15021.
- (15) Han Du, W.-G.; Noodleman, L. Broken Symmetry DFT Calculations/Analysis for Oxidized and Reduced Dinuclear Center in Cytochrome *c* Oxidase: Relating Structures, Protonation States, Energies, and Mössbauer Properties in *ba*<sub>3</sub> *Thermus thermophilus*. *Inorg. Chem.* **2015**, *54*, 7272-7290.
- (16) Han Du, W.-G.; Noodleman, L. Density Functional Study for the Bridged Dinuclear Center Based on a High-Resolution X-Ray Crystal Structure of *ba*<sub>3</sub> Cytochrome *c* Oxidase from *Thermus thermophilus*. *Inorg. Chem.* **2013**, *52*, 14072-14088.
- (17) Ghysels, A.; Van Neck, D.; Van Speybroeck, V.; Verstraelen, T.; Waroquier, M. Vibrational Modes in Partially Optimized Molecular Systems. *J. Chem. Phys.* **2007**, *126*, 224102.
- (18) Ghysels, A.; Van Neck, D.; Waroquier, M. Cartesian Formulation of the Mobile Block Hessian Approach to Vibrational Analysis in Partially Optimized Systems. *J. Chem. Phys.* **2007**, *127*, 164108.
- (19) Soda, T.; Kitagawa, Y.; Onishi, T.; Takano, Y.; Shigeta, Y.; Nagao, H.; Yoshioka, Y.; Yamaguchi, K. *Ab initio* Computations of Effective Exchange Integrals for H-H, H-He-H and Mn<sub>2</sub>O<sub>2</sub> Complex: Comparison of Broken-Symmetry Approaches. *Chem. Phys. Lett.* **2000**, *319*, 223-230.

- (20) Neese, F. Definition of Corresponding Orbitals and the Diradical Character in Broken Symmetry DFT Calculations on Spin Coupled Systems. *J. Phys. Chem. Solids* **2004**, *65*, 781-785.
- (21) Sinnecker, S.; Neese, F.; Noodleman, L.; Lubitz, W. Calculating the Electron Paramagnetic Resonance Parameters of Exchange Coupled Transition Metal Complexes Using Broken Symmetry Density Functional Theory: Application to a Mn-III/Mn-IV Model Compound. *J. Am. Chem. Soc.* **2004**, *126*, 2613-2622.
- (22) Noodleman, L., From the Quantum Chemistry of Iron-Sulfur Clusters to Redox Energetics and Reaction Pathways in Metalloenzymes. In *Iron-Sulfur Clusters in Chemistry and Biology*, Rouault, T., Ed. De Gruyter: Berlin/Boston, 2017; pp 21-75.
- (23) Noodleman, L.; Han Du, W.-G.; Fee, J. A.; Götz, A. W.; Walker, R. C. Linking Chemical Electron-Proton Transfer to Proton Pumping in Cytochrome *c* Oxidase: Broken-Symmetry DFT Exploration of Intermediates along the Catalytic Reaction Pathway of the Iron-Copper Dinuclear Complex. *Inorg. Chem.* **2014**, *53*, 6458-6472.
- (24) Han Du, W.-G.; Götz, A. W.; Yang, L. H.; Walker, R. C.; Noodleman, L. A Broken-Symmetry Density Functional Study of Structures, Energies, and Protonation States Along the Catalytic O-O Bond Cleavage Pathway in *ba*<sub>3</sub> Cytochrome *c* Oxidase from *Thermus thermophilus*. *Phys. Chem. Chem. Phys.* **2016**, *18*, 21162-21171.

**Cartesian Coordinates of the optimized geometries of the CcO dinuclear center states A, Peroxo, Hydroperoxo, P<sub>M</sub>, P<sub>R</sub>, F, F<sub>H</sub>, and O<sub>H</sub>:**

**State A:**

205

|   |           |           |           |   |            |           |           |
|---|-----------|-----------|-----------|---|------------|-----------|-----------|
| C | 0.705000  | 7.351000  | 24.202000 | N | -0.926985  | 1.544489  | 18.718196 |
| C | 1.258082  | 6.127024  | 23.537897 | H | -4.300991  | 0.405106  | 16.571178 |
| O | 1.784951  | 5.216086  | 24.200453 | H | -3.780316  | 1.691247  | 15.469448 |
| H | 1.308282  | 7.571028  | 25.085173 | H | -1.315997  | 1.719334  | 15.585187 |
| H | -0.317621 | 7.132772  | 24.529747 | H | -2.939473  | 1.409975  | 19.441847 |
| H | 0.679538  | 8.218573  | 23.537918 | H | 0.622699   | 1.754010  | 17.252783 |
| N | 1.129820  | 6.038144  | 22.202182 | C | -4.828961  | 3.854520  | 21.671138 |
| C | 1.796293  | 4.963472  | 21.496658 | C | -3.507899  | 3.188845  | 21.793123 |
| C | 1.449888  | 4.885127  | 20.013579 | N | -3.276072  | 2.112385  | 22.625879 |
| C | 2.271300  | 3.767358  | 19.486779 | C | -2.307902  | 3.418097  | 21.164190 |
| N | 1.956737  | 2.451013  | 19.809434 | C | -1.992023  | 1.717453  | 22.484198 |
| C | 3.538866  | 3.795898  | 18.975521 | N | -1.373053  | 2.487605  | 21.593033 |
| C | 3.003802  | 1.702150  | 19.502493 | H | -4.695697  | 4.844670  | 21.225971 |
| N | 3.997246  | 2.486654  | 18.991631 | H | -5.290477  | 3.983599  | 22.654531 |
| H | 0.841693  | 6.859389  | 21.682448 | H | -3.950326  | 1.698481  | 23.296067 |
| H | 1.523501  | 4.018644  | 21.966823 | H | -2.071162  | 4.147835  | 20.407573 |
| H | 0.381340  | 4.689020  | 19.880499 | H | -1.557006  | 0.874313  | 22.986739 |
| H | 1.702354  | 5.819652  | 19.500361 | C | -8.632432  | -3.687762 | 17.805954 |
| H | 4.161224  | 4.602778  | 18.629100 | C | -8.417737  | -2.995926 | 19.117557 |
| H | 3.097528  | 0.642279  | 19.632491 | O | -9.093967  | -2.043146 | 19.498022 |
| H | 2.882791  | 5.080908  | 21.595366 | O | -7.420379  | -3.519430 | 19.827853 |
| C | 8.727128  | 3.570275  | 19.837235 | H | -7.680475  | -3.766591 | 17.271956 |
| C | 7.687706  | 2.645526  | 19.273525 | H | -9.350408  | -3.125560 | 17.208262 |
| C | 8.023772  | 1.418585  | 18.699231 | C | -10.657323 | -3.293885 | 22.474737 |
| C | 6.336535  | 2.970220  | 19.340622 | C | -10.531206 | -1.953973 | 23.078514 |
| C | 7.051323  | 0.551931  | 18.216573 | N | -9.306712  | -1.331263 | 23.212785 |
| C | 5.357122  | 2.113648  | 18.853329 | C | -11.452763 | -1.097638 | 23.610000 |
| C | 5.698314  | 0.881521  | 18.283329 | C | -9.451319  | -0.145879 | 23.794219 |
| O | 4.705194  | 0.088953  | 17.819106 | N | -10.753551 | 0.008207  | 24.043066 |
| H | 8.418489  | 4.614200  | 19.720061 | H | -10.280940 | -3.281015 | 21.449284 |
| H | 9.684660  | 3.432602  | 19.325930 | H | -11.703602 | -3.605027 | 22.472214 |
| H | 9.068710  | 1.129110  | 18.628619 | H | -8.395706  | -1.762437 | 22.875822 |
| H | 6.027804  | 3.899807  | 19.803682 | H | -12.520418 | -1.180302 | 23.722154 |
| H | 7.341196  | -0.392751 | 17.771585 | H | -8.676543  | 0.573593  | 24.010058 |
| C | -3.918626 | 1.430502  | 16.522856 | C | 0.023021   | -7.212119 | 24.184181 |
| C | -2.632730 | 1.532752  | 17.251361 | C | 0.757528   | -6.109417 | 23.486079 |
| N | -1.423582 | 1.634359  | 16.590492 | N | 1.749502   | -6.329169 | 22.547040 |
| C | -2.299330 | 1.478192  | 18.581149 | C | 0.523936   | -4.750299 | 23.417253 |
| C | -0.420217 | 1.645773  | 17.499035 | C | 2.080362   | -5.157771 | 21.953243 |

|    |           |           |           |    |            |           |           |
|----|-----------|-----------|-----------|----|------------|-----------|-----------|
| N  | 1.348560  | -4.177497 | 22.459688 | C  | 7.558477   | -1.160091 | 24.740644 |
| H  | -0.488199 | -7.823418 | 23.429150 | N  | -0.341913  | -2.004778 | 21.264181 |
| H  | -0.748825 | -6.759040 | 24.812645 | C  | -0.794080  | -2.029677 | 19.970244 |
| H  | 2.158751  | -7.231605 | 22.328721 | C  | -2.191784  | -1.661296 | 19.932912 |
| H  | -0.178579 | -4.153035 | 23.972277 | C  | -2.574463  | -1.421804 | 21.244843 |
| H  | 2.834257  | -5.052926 | 21.194415 | C  | -1.418587  | -1.662201 | 22.055729 |
| C  | -7.126501 | -3.012345 | 29.433783 | C  | -3.059538  | -1.562044 | 18.791273 |
| N  | -6.025345 | -2.314713 | 30.060446 | C  | -3.914049  | -1.060285 | 21.759505 |
| C  | -5.231575 | -1.467212 | 29.401308 | C  | -4.813576  | -2.292371 | 21.841509 |
| N  | -5.443171 | -1.196189 | 28.124582 | C  | -6.058168  | -2.056535 | 22.665480 |
| N  | -4.203412 | -0.902849 | 30.045506 | O  | -7.165988  | -2.490965 | 22.201760 |
| H  | -6.776320 | -3.815062 | 28.776240 | O  | -5.948416  | -1.488482 | 23.781127 |
| H  | -7.728173 | -2.304559 | 28.861668 | C  | 4.544165   | -3.456792 | 17.277232 |
| H  | -5.663649 | -2.690283 | 30.929753 | O  | 5.578853   | -2.445534 | 17.451051 |
| H  | -6.111489 | -1.711613 | 27.552434 | C  | 5.097048   | -4.831580 | 17.607288 |
| H  | -4.950880 | -0.404892 | 27.692330 | H  | 5.937264   | -5.068189 | 16.945352 |
| H  | -4.250877 | -0.856606 | 31.056522 | Cu | 0.148298   | 1.959401  | 20.436012 |
| H  | -3.657578 | -0.170345 | 29.562126 | H  | 8.891070   | 3.392425  | 20.913367 |
| Fe | 1.571261  | -2.113084 | 21.885812 | H  | -4.673317  | 2.104938  | 16.938340 |
| C  | -1.377631 | -1.508654 | 23.430284 | H  | -5.531461  | 3.294706  | 21.032081 |
| C  | -0.037637 | -2.347238 | 18.863662 | H  | -9.006490  | -4.710141 | 17.956796 |
| C  | 4.529508  | -2.778220 | 20.305778 | H  | -10.071120 | -4.017668 | 23.050776 |
| C  | 3.250914  | -1.502057 | 24.773716 | H  | 0.595656   | -7.919075 | 24.825696 |
| N  | 1.044564  | -1.669794 | 23.729673 | H  | -7.746925  | -3.426169 | 30.227401 |
| C  | -0.239153 | -1.488078 | 24.195143 | O  | -8.076687  | 0.558827  | 20.141334 |
| C  | -0.216096 | -1.149781 | 25.602099 | H  | -7.690311  | 0.746877  | 19.264959 |
| C  | 1.099737  | -1.076399 | 25.969530 | H  | -8.356297  | -0.379959 | 20.057604 |
| C  | 1.875891  | -1.426341 | 24.797185 | O  | -7.275888  | -2.282262 | 26.054212 |
| C  | 1.650485  | -0.628267 | 27.270530 | H  | -6.878410  | -2.003449 | 25.189511 |
| O  | -2.799408 | -1.901452 | 17.634297 | H  | -7.237219  | -3.256596 | 26.016327 |
| C  | -1.399804 | -0.841769 | 26.435493 | O  | 1.168705   | 4.027237  | 27.390896 |
| C  | -1.796095 | 0.641820  | 26.380225 | H  | 0.925163   | 3.586218  | 26.542491 |
| C  | -2.892285 | 0.863849  | 27.398781 | H  | 1.158162   | 3.294949  | 28.035439 |
| O  | -2.575272 | 0.857193  | 28.610368 | O  | -7.365109  | 2.324603  | 24.248337 |
| O  | -4.101224 | 0.958252  | 26.974109 | H  | -6.496736  | 1.856755  | 24.357699 |
| N  | 2.115723  | -2.605999 | 20.002147 | H  | -7.317377  | 2.685692  | 23.344834 |
| C  | 1.303864  | -2.637122 | 18.890341 | O  | -4.971553  | 0.971375  | 24.471595 |
| C  | 2.077815  | -2.940529 | 17.703521 | H  | -4.591492  | 0.940992  | 25.402267 |
| C  | 3.373229  | -3.090384 | 18.115342 | H  | -5.253178  | 0.050723  | 24.251136 |
| C  | 3.388161  | -2.854597 | 19.544827 | O  | -5.793587  | 2.366676  | 28.692133 |
| C  | 1.500126  | -3.043427 | 16.342671 | H  | -5.155591  | 1.861998  | 28.125472 |
| N  | 3.491200  | -2.176439 | 22.443575 | H  | -5.547804  | 3.297131  | 28.522204 |
| C  | 4.574612  | -2.437366 | 21.637778 | O  | 0.717148   | 2.791725  | 24.852072 |
| C  | 5.807504  | -2.272844 | 22.368546 | H  | 1.043030   | 3.625067  | 24.434933 |
| C  | 5.457464  | -1.899365 | 23.648177 | H  | -0.100846  | 2.585153  | 24.369011 |
| C  | 4.003302  | -1.851994 | 23.676107 | H  | -7.333260  | -3.040818 | 20.736258 |
| C  | 7.152556  | -2.492114 | 21.789943 | H  | -2.129999  | 0.908796  | 25.378195 |
| C  | 6.305038  | -1.633064 | 24.785896 | H  | -0.926804  | 1.249831  | 26.638170 |

|   |           |           |           |   |            |           |           |
|---|-----------|-----------|-----------|---|------------|-----------|-----------|
| H | -1.177123 | -1.085537 | 27.478723 | H | 5.430747   | -4.874624 | 18.646393 |
| H | -2.255389 | -1.456371 | 26.134730 | H | 2.277139   | -3.184433 | 15.589092 |
| H | 2.632454  | -1.065206 | 27.472027 | H | 0.802705   | -3.886869 | 16.279492 |
| H | 1.764099  | 0.463881  | 27.270174 | H | 0.942567   | -2.134315 | 16.092228 |
| H | 0.978661  | -0.894195 | 28.091924 | H | -0.547914  | -2.343288 | 17.913019 |
| H | -2.311119 | -1.314717 | 23.937824 | H | -4.053788  | -1.140254 | 19.028849 |
| H | 3.779692  | -1.252252 | 25.681206 | H | -4.384018  | -0.300359 | 21.128483 |
| H | 5.867777  | -1.840640 | 25.761467 | H | -3.823263  | -0.634186 | 22.753814 |
| H | 8.128156  | -1.015705 | 25.654959 | H | -4.255945  | -3.095710 | 22.339444 |
| H | 8.034186  | -0.889100 | 23.805274 | H | -5.069220  | -2.641745 | 20.840510 |
| H | 7.884898  | -2.692262 | 22.575869 | H | 6.226086   | -2.597267 | 16.734676 |
| H | 7.146937  | -3.338358 | 21.096414 | H | 5.061392   | -0.825465 | 17.628680 |
| H | 7.482683  | -1.605950 | 21.232435 | O | 1.687639   | -0.362603 | 21.404439 |
| H | 5.467879  | -2.932151 | 19.800133 | O | 2.143037   | 0.493942  | 22.263026 |
| H | 4.230054  | -3.441764 | 16.229002 | H | -11.160876 | 0.825065  | 24.487829 |
| H | 4.310373  | -5.578311 | 17.459916 |   |            |           |           |

## State Peroxo:

205

|   |           |          |           |   |           |           |           |
|---|-----------|----------|-----------|---|-----------|-----------|-----------|
| C | 0.705000  | 7.351000 | 24.202000 | C | 5.312016  | 1.934828  | 19.069090 |
| C | 0.852177  | 5.924138 | 23.719494 | C | 5.652131  | 0.849597  | 18.252261 |
| O | 1.038202  | 4.985802 | 24.516078 | O | 4.657771  | 0.098949  | 17.719211 |
| H | 1.654554  | 7.652870 | 24.653655 | H | 8.414762  | 4.528607  | 19.644107 |
| H | -0.067917 | 7.381088 | 24.973559 | H | 9.654474  | 3.302382  | 19.319085 |
| H | 0.452107  | 8.046672 | 23.397174 | H | 9.019815  | 1.271000  | 18.263536 |
| N | 0.785134  | 5.709707 | 22.390807 | H | 6.006497  | 3.578923  | 20.242674 |
| C | 1.141184  | 4.412741 | 21.836418 | H | 7.275479  | -0.203776 | 17.344075 |
| C | 1.212432  | 4.438681 | 20.308260 | C | -3.994294 | 1.366374  | 16.500040 |
| C | 2.129581  | 3.373898 | 19.829088 | C | -2.714041 | 1.308416  | 17.238926 |
| N | 1.820092  | 2.020969 | 19.846814 | N | -1.519446 | 1.007822  | 16.618020 |
| C | 3.450247  | 3.509867 | 19.503245 | C | -2.400996 | 1.413283  | 18.568673 |
| C | 2.923842  | 1.353419 | 19.548051 | C | -0.534695 | 0.946543  | 17.541799 |
| N | 3.949822  | 2.228191 | 19.330334 | N | -1.045775 | 1.191034  | 18.739839 |
| H | 0.742454  | 6.506562 | 21.767825 | H | -4.481682 | 0.384467  | 16.518331 |
| H | 0.406795  | 3.671070 | 22.150643 | H | -3.820911 | 1.641502  | 15.455492 |
| H | 0.215349  | 4.325605 | 19.875698 | H | -1.406450 | 0.851265  | 15.622259 |
| H | 1.617869  | 5.401437 | 19.977620 | H | -3.042533 | 1.626659  | 19.402559 |
| H | 4.075336  | 4.376306 | 19.381755 | H | 0.497558  | 0.738310  | 17.323125 |
| H | 3.028488  | 0.286999 | 19.495118 | C | -4.782406 | 3.894721  | 21.564867 |
| H | 2.118278  | 4.121730 | 22.232911 | C | -3.516783 | 3.147002  | 21.734001 |
| C | 8.706961  | 3.489104 | 19.832015 | N | -3.363548 | 2.117883  | 22.645026 |
| C | 7.650254  | 2.551707 | 19.318192 | C | -2.323109 | 3.209618  | 21.058878 |
| C | 7.978815  | 1.462885 | 18.508880 | C | -2.132423 | 1.589454  | 22.497731 |
| C | 6.300727  | 2.759693 | 19.596958 | N | -1.476118 | 2.222767  | 21.531754 |
| C | 7.000820  | 0.622750 | 17.991766 | H | -4.595990 | 4.801044  | 20.982576 |

|    |            |           |           |    |            |           |           |
|----|------------|-----------|-----------|----|------------|-----------|-----------|
| H  | -5.209846  | 4.177328  | 22.531170 | C  | 3.016545   | -1.859013 | 24.809759 |
| H  | -4.080893  | 1.768877  | 23.308881 | N  | 0.804902   | -1.803048 | 23.760127 |
| H  | -2.042082  | 3.861781  | 20.249882 | C  | -0.461927  | -1.566143 | 24.235311 |
| H  | -1.743231  | 0.766943  | 23.063827 | C  | -0.421838  | -1.292481 | 25.656519 |
| C  | -8.676092  | -3.670546 | 17.853897 | C  | 0.896397   | -1.347191 | 26.023532 |
| C  | -8.347196  | -3.011922 | 19.160999 | C  | 1.647772   | -1.686454 | 24.830724 |
| O  | -8.631089  | -1.843810 | 19.407896 | C  | 1.513317   | -1.091391 | 27.345566 |
| O  | -7.693876  | -3.794984 | 20.015115 | O  | -3.013287  | -1.755305 | 17.677816 |
| H  | -7.766311  | -3.673805 | 17.241653 | C  | -1.599568  | -0.929379 | 26.480315 |
| H  | -9.436852  | -3.084207 | 17.337117 | C  | -2.093055  | 0.498620  | 26.205383 |
| C  | -10.745085 | -3.390185 | 22.460898 | C  | -3.107892  | 0.887299  | 27.254869 |
| C  | -10.720486 | -2.021620 | 23.007627 | O  | -2.721786  | 0.986991  | 28.441808 |
| N  | -9.535626  | -1.324785 | 23.130945 | O  | -4.333236  | 1.026947  | 26.893110 |
| C  | -11.695714 | -1.201663 | 23.496736 | N  | 1.914930   | -2.470942 | 19.975093 |
| C  | -9.752850  | -0.131684 | 23.671348 | C  | 1.106898   | -2.380518 | 18.864115 |
| N  | -11.065063 | -0.042795 | 23.897112 | C  | 1.863141   | -2.646896 | 17.659739 |
| H  | -10.398065 | -3.397097 | 21.424249 | C  | 3.145278   | -2.913166 | 18.056938 |
| H  | -11.755435 | -3.800509 | 22.507486 | C  | 3.173640   | -2.769188 | 19.500066 |
| H  | -8.603792  | -1.741643 | 22.849877 | C  | 1.273596   | -2.646861 | 16.299629 |
| H  | -12.758753 | -1.339941 | 23.597630 | N  | 3.276044   | -2.353097 | 22.437935 |
| H  | -9.011818  | 0.634930  | 23.839311 | C  | 4.356228   | -2.619151 | 21.632857 |
| C  | -0.030867  | -7.208338 | 24.242616 | C  | 5.581748   | -2.608776 | 22.400377 |
| C  | 0.643453   | -6.105926 | 23.484774 | C  | 5.224707   | -2.321292 | 23.698274 |
| N  | 1.592350   | -6.319666 | 22.499586 | C  | 3.771973   | -2.175534 | 23.702671 |
| C  | 0.378176   | -4.754274 | 23.409285 | C  | 6.929139   | -2.869594 | 21.844722 |
| C  | 1.869019   | -5.152152 | 21.873750 | C  | 6.060183   | -2.181479 | 24.865441 |
| N  | 1.139134   | -4.179292 | 22.399904 | C  | 7.358152   | -1.841779 | 24.870979 |
| H  | -0.612547  | -7.814540 | 23.536165 | N  | -0.535948  | -1.905717 | 21.287568 |
| H  | -0.739994  | -6.754114 | 24.940350 | C  | -0.990861  | -1.866489 | 19.991047 |
| H  | 2.001085   | -7.219015 | 22.267772 | C  | -2.396386  | -1.530776 | 19.972020 |
| H  | -0.297629  | -4.163657 | 24.001592 | C  | -2.786042  | -1.370012 | 21.291600 |
| H  | 2.588412   | -5.040469 | 21.083452 | C  | -1.627677  | -1.636333 | 22.093326 |
| C  | -7.190131  | -2.987760 | 29.403062 | C  | -3.270756  | -1.416437 | 18.834064 |
| N  | -6.270904  | -2.037877 | 29.987271 | C  | -4.127933  | -1.049812 | 21.819733 |
| C  | -5.473611  | -1.249537 | 29.265286 | C  | -5.021465  | -2.286947 | 21.856391 |
| N  | -5.521222  | -1.272684 | 27.936027 | C  | -6.259071  | -2.073732 | 22.694159 |
| N  | -4.605493  | -0.456634 | 29.888208 | O  | -7.361102  | -2.546537 | 22.252952 |
| H  | -6.662081  | -3.773350 | 28.851931 | O  | -6.156382  | -1.475441 | 23.794024 |
| H  | -7.888959  | -2.476875 | 28.738646 | C  | 4.257499   | -3.378712 | 17.185717 |
| H  | -6.024975  | -2.162582 | 30.962234 | O  | 5.387900   | -2.469996 | 17.286695 |
| H  | -6.271290  | -1.762562 | 27.445753 | C  | 4.670090   | -4.804302 | 17.495694 |
| H  | -5.130942  | -0.452069 | 27.457698 | H  | 5.472501   | -5.121602 | 16.819326 |
| H  | -4.657177  | -0.363197 | 30.893549 | Cu | -0.012706  | 1.214727  | 20.464909 |
| H  | -3.973605  | 0.171260  | 29.363543 | H  | 8.891070   | 3.392424  | 20.913367 |
| Fe | 1.349869   | -2.127733 | 21.889986 | H  | -4.673317  | 2.104938  | 16.938340 |
| C  | -1.600673  | -1.548878 | 23.470599 | H  | -5.531461  | 3.294705  | 21.032081 |
| C  | -0.231950  | -2.081847 | 18.863069 | H  | -9.006488  | -4.710142 | 17.956795 |
| C  | 4.308317   | -2.836041 | 20.273474 | H  | -10.071118 | -4.017670 | 23.050775 |

|   |           |           |           |   |            |           |           |
|---|-----------|-----------|-----------|---|------------|-----------|-----------|
| H | 0.595658  | -7.919075 | 24.825695 | H | 2.260770   | -0.293885 | 27.270653 |
| H | -7.746922 | -3.426171 | 30.227400 | H | 0.761940   | -0.798921 | 28.083361 |
| O | -7.095052 | 0.328278  | 20.769894 | H | -2.537341  | -1.380752 | 23.980532 |
| H | -7.114095 | 0.862127  | 19.953240 | H | 3.538109   | -1.712345 | 25.744495 |
| H | -7.588341 | -0.479857 | 20.515237 | H | 5.573816   | -2.361410 | 25.822559 |
| O | -7.553562 | -2.254425 | 26.019522 | H | 7.905051   | -1.777212 | 25.807909 |
| H | -7.127376 | -1.978461 | 25.165926 | H | 7.893179   | -1.601177 | 23.960204 |
| H | -7.578449 | -3.227988 | 25.953928 | H | 7.571595   | -3.326514 | 22.602273 |
| O | 0.940544  | 2.314721  | 27.062442 | H | 6.879737   | -3.540659 | 20.982183 |
| H | 1.042049  | 2.118555  | 26.095716 | H | 7.406388   | -1.936272 | 21.517800 |
| H | 0.838542  | 1.434310  | 27.459998 | H | 5.240887   | -3.005431 | 19.762357 |
| O | -7.546598 | 2.023375  | 23.225173 | H | 3.915744   | -3.338107 | 16.146333 |
| H | -6.745577 | 1.763718  | 23.737905 | H | 3.806567   | -5.460037 | 17.345761 |
| H | -7.441430 | 1.517128  | 22.392857 | H | 5.000791   | -4.901024 | 18.532848 |
| O | -5.207675 | 1.035199  | 24.407975 | H | 2.042452   | -2.725694 | 15.529081 |
| H | -4.849201 | 1.021703  | 25.347925 | H | 0.578566   | -3.486541 | 16.177996 |
| H | -5.460380 | 0.104702  | 24.202808 | H | 0.707082   | -1.727134 | 16.124152 |
| O | -5.745439 | 2.869804  | 28.384391 | H | -0.749758  | -2.012749 | 17.919607 |
| H | -5.206186 | 2.183082  | 27.906181 | H | -4.263296  | -0.993410 | 19.077564 |
| H | -5.638460 | 3.665977  | 27.827865 | H | -4.614060  | -0.274926 | 21.224866 |
| O | 1.408766  | 2.099882  | 24.343291 | H | -4.039662  | -0.663890 | 22.830158 |
| H | 1.215096  | 3.032468  | 24.115121 | H | -4.464332  | -3.112958 | 22.316859 |
| H | 1.159517  | 1.556591  | 23.560871 | H | -5.286819  | -2.597007 | 20.845169 |
| H | -7.515320 | -3.261231 | 20.883200 | H | 6.198507   | -3.003250 | 17.372402 |
| H | -2.527457 | 0.568701  | 25.211888 | H | 5.016763   | -0.805081 | 17.516562 |
| H | -1.246002 | 1.184827  | 26.264190 | O | 1.720206   | -0.370654 | 21.742204 |
| H | -1.340754 | -0.998794 | 27.539490 | O | 0.733803   | 0.509473  | 22.105616 |
| H | -2.422282 | -1.634478 | 26.304151 | H | -11.524047 | 0.769917  | 24.296157 |
| H | 2.030127  | -1.983414 | 27.721189 |   |            |           |           |

## State Hydroperoxo:

205

|   |           |          |           |   |          |          |           |
|---|-----------|----------|-----------|---|----------|----------|-----------|
| C | 0.705000  | 7.351000 | 24.202000 | C | 3.026054 | 1.425295 | 19.540446 |
| C | 0.946284  | 5.977350 | 23.627578 | N | 4.057399 | 2.258626 | 19.211352 |
| O | 1.002263  | 4.979397 | 24.369617 | H | 1.207875 | 6.783328 | 21.795004 |
| H | 1.631317  | 7.669967 | 24.691040 | H | 1.445104 | 3.859147 | 22.209435 |
| H | -0.081332 | 7.288605 | 24.957658 | H | 0.369870 | 4.352600 | 20.067088 |
| H | 0.433672  | 8.085381 | 23.439554 | H | 1.646416 | 5.511353 | 19.649178 |
| N | 1.130337  | 5.903461 | 22.294343 | H | 4.239820 | 4.399418 | 19.090413 |
| C | 1.760918  | 4.751967 | 21.678489 | H | 3.109611 | 0.355017 | 19.557246 |
| C | 1.430184  | 4.587188 | 20.195862 | H | 2.850637 | 4.837905 | 21.783304 |
| C | 2.290100  | 3.490266 | 19.689292 | C | 8.827562 | 3.359588 | 19.812567 |
| N | 1.956455  | 2.149038 | 19.844862 | C | 7.754299 | 2.444188 | 19.304664 |
| C | 3.596717  | 3.562290 | 19.300635 | C | 8.069587 | 1.286152 | 18.572074 |

|   |            |           |           |    |           |           |           |
|---|------------|-----------|-----------|----|-----------|-----------|-----------|
| C | 6.403663   | 2.723183  | 19.515031 | H  | -8.832245 | 0.583200  | 24.196653 |
| C | 7.093502   | 0.446885  | 18.081444 | C  | -0.024180 | -7.207500 | 24.242551 |
| C | 5.408267   | 1.906110  | 19.004262 | C  | 0.675659  | -6.115041 | 23.500203 |
| C | 5.702034   | 0.711794  | 18.259916 | N  | 1.664284  | -6.336920 | 22.556695 |
| O | 4.775169   | -0.030658 | 17.788479 | C  | 0.417294  | -4.764776 | 23.411477 |
| H | 8.643122   | 4.386528  | 19.474086 | C  | 1.973385  | -5.175608 | 21.940157 |
| H | 9.803771   | 3.044600  | 19.433925 | N  | 1.225532  | -4.200135 | 22.436157 |
| H | 9.115158   | 1.050480  | 18.389450 | H  | -0.602591 | -7.806725 | 23.528023 |
| H | 6.123651   | 3.598522  | 20.090231 | H  | -0.734713 | -6.746020 | 24.933737 |
| H | 7.362192   | -0.440883 | 17.517910 | H  | 2.081946  | -7.237330 | 22.347190 |
| C | -3.908819  | 1.470495  | 16.475192 | H  | -0.280816 | -4.168841 | 23.970758 |
| C | -2.633360  | 1.481240  | 17.231104 | H  | 2.720209  | -5.067507 | 21.175950 |
| N | -1.413982  | 1.333994  | 16.597583 | C  | -7.233246 | -2.917111 | 29.410677 |
| C | -2.327146  | 1.543026  | 18.565420 | N  | -6.106155 | -2.200037 | 29.970508 |
| C | -0.426114  | 1.326148  | 17.516579 | C  | -5.361745 | -1.345138 | 29.262568 |
| N | -0.955191  | 1.451075  | 18.725877 | N  | -5.691788 | -1.016313 | 28.025677 |
| H | -4.294794  | 0.447213  | 16.404375 | N  | -4.259536 | -0.826348 | 29.822318 |
| H | -3.746003  | 1.843354  | 15.458779 | H  | -6.908946 | -3.652348 | 28.667016 |
| H | -1.285398  | 1.271179  | 15.592955 | H  | -7.926729 | -2.210386 | 28.951167 |
| H | -2.983063  | 1.643388  | 19.409369 | H  | -5.670343 | -2.591556 | 30.797920 |
| H | 0.622806   | 1.246216  | 17.287929 | H  | -6.402395 | -1.512701 | 27.485796 |
| C | -4.810576  | 3.921055  | 21.571645 | H  | -5.163497 | -0.271590 | 27.552148 |
| C | -3.522375  | 3.207950  | 21.717372 | H  | -4.210177 | -0.824914 | 30.834611 |
| N | -3.384798  | 2.085612  | 22.508924 | H  | -3.772504 | -0.054885 | 29.340775 |
| C | -2.300935  | 3.377329  | 21.113374 | Fe | 1.433071  | -2.206227 | 21.911400 |
| C | -2.135076  | 1.605947  | 22.369932 | C  | -1.496613 | -1.571350 | 23.517825 |
| N | -1.446212  | 2.367863  | 21.522894 | C  | -0.189321 | -2.195419 | 18.908855 |
| H | -4.661368  | 4.840389  | 21.000576 | C  | 4.370215  | -2.929687 | 20.274824 |
| H | -5.237736  | 4.176558  | 22.546354 | C  | 3.136898  | -1.891443 | 24.811470 |
| H | -4.106016  | 1.694269  | 23.149518 | N  | 0.915103  | -1.828245 | 23.781896 |
| H | -2.004898  | 4.112749  | 20.384051 | C  | -0.343798 | -1.563211 | 24.261739 |
| H | -1.768119  | 0.712838  | 22.835612 | C  | -0.282614 | -1.246297 | 25.671620 |
| C | -8.383825  | -3.841364 | 17.720084 | C  | 1.037631  | -1.310696 | 26.030058 |
| C | -8.083235  | -3.014064 | 18.932156 | C  | 1.772115  | -1.693460 | 24.839817 |
| O | -8.152346  | -1.785904 | 18.943130 | C  | 1.664645  | -1.039732 | 27.344262 |
| O | -7.709041  | -3.738129 | 19.982337 | O  | -2.980008 | -1.727129 | 17.730797 |
| H | -7.434310  | -4.217670 | 17.321782 | C  | -1.448769 | -0.850194 | 26.493998 |
| H | -8.866223  | -3.223062 | 16.962642 | C  | -1.860912 | 0.610783  | 26.258698 |
| C | -10.816672 | -3.295959 | 22.701086 | C  | -2.994504 | 0.934880  | 27.206040 |
| C | -10.660029 | -2.007994 | 23.396345 | O  | -2.723380 | 1.082687  | 28.418903 |
| N | -9.479516  | -1.298174 | 23.360508 | O  | -4.186945 | 0.952955  | 26.731465 |
| C | -11.523457 | -1.263443 | 24.145393 | N  | 1.962544  | -2.602395 | 20.006758 |
| C | -9.591983  | -0.169310 | 24.051876 | C  | 1.145821  | -2.514884 | 18.902118 |
| N | -10.834117 | -0.133608 | 24.534688 | C  | 1.903056  | -2.761105 | 17.691141 |
| H | -10.678096 | -3.168530 | 21.620433 | C  | 3.195492  | -2.992165 | 18.076788 |
| H | -11.815804 | -3.701493 | 22.881691 | C  | 3.222954  | -2.869054 | 19.520190 |
| H | -8.595526  | -1.665102 | 22.889260 | C  | 1.312053  | -2.742836 | 16.331549 |
| H | -12.553642 | -1.429827 | 24.425077 | N  | 3.366366  | -2.422240 | 22.445903 |



|    |            |           |           |   |            |           |           |
|----|------------|-----------|-----------|---|------------|-----------|-----------|
| C  | 4.436011   | -2.704095 | 21.630012 | H | -7.632192  | 2.770127  | 23.484193 |
| C  | 5.667436   | -2.700166 | 22.385769 | O | -5.165150  | 1.042718  | 24.288934 |
| C  | 5.323876   | -2.411811 | 23.688273 | H | -4.727753  | 0.985591  | 25.191851 |
| C  | 3.874579   | -2.241445 | 23.702788 | H | -5.483188  | 0.128039  | 24.087156 |
| C  | 7.008178   | -2.956224 | 21.813129 | O | -5.615383  | 2.955143  | 28.004490 |
| C  | 6.165275   | -2.306882 | 24.855409 | H | -5.104456  | 2.202520  | 27.612765 |
| C  | 7.474434   | -2.015087 | 24.864506 | H | -4.976440  | 3.337374  | 28.637009 |
| N  | -0.476810  | -2.005460 | 21.332236 | O | 0.861311   | 2.244993  | 24.194303 |
| C  | -0.938273  | -1.959914 | 20.040699 | H | 0.943467   | 3.234739  | 24.114776 |
| C  | -2.343544  | -1.614929 | 20.033227 | H | -0.099923  | 2.109893  | 24.232514 |
| C  | -2.724485  | -1.467515 | 21.357604 | H | -7.533790  | -3.121253 | 20.791958 |
| C  | -1.554565  | -1.722827 | 22.147092 | H | -2.163858  | 0.758034  | 25.222931 |
| C  | -3.230996  | -1.454922 | 18.906877 | H | -1.010472  | 1.259424  | 26.478437 |
| C  | -4.055751  | -1.114683 | 21.892859 | H | -1.213877  | -0.971075 | 27.554547 |
| C  | -5.019462  | -2.298451 | 21.883234 | H | -2.305827  | -1.501009 | 26.279300 |
| C  | -6.285147  | -1.987858 | 22.645504 | H | 2.199962   | -1.922614 | 27.713788 |
| O  | -7.394685  | -2.358849 | 22.136178 | H | 2.395608   | -0.228564 | 27.259569 |
| O  | -6.197912  | -1.402712 | 23.755100 | H | 0.915343   | -0.758050 | 28.087740 |
| C  | 4.361492   | -3.340261 | 17.209777 | H | -2.421786  | -1.376597 | 24.040553 |
| O  | 5.534848   | -2.582532 | 17.517288 | H | 3.668566   | -1.739271 | 25.739630 |
| C  | 4.709594   | -4.813900 | 17.336243 | H | 5.673643   | -2.483151 | 25.810544 |
| H  | 5.543768   | -5.055154 | 16.668316 | H | 8.023100   | -1.980145 | 25.801565 |
| Cu | 0.101676   | 1.618089  | 20.435750 | H | 8.019028   | -1.784302 | 23.956572 |
| H  | 8.891071   | 3.392424  | 20.913367 | H | 7.657088   | -3.431042 | 22.554120 |
| H  | -4.673317  | 2.104938  | 16.938341 | H | 6.947656   | -3.604102 | 20.935015 |
| H  | -5.531461  | 3.294705  | 21.032081 | H | 7.481024   | -2.015311 | 21.503279 |
| H  | -9.006488  | -4.710142 | 17.956796 | H | 5.287582   | -3.086303 | 19.731301 |
| H  | -10.071118 | -4.017669 | 23.050776 | H | 4.064466   | -3.147670 | 16.168328 |
| H  | 0.595658   | -7.919074 | 24.825696 | H | 3.841618   | -5.422543 | 17.066336 |
| H  | -7.746921  | -3.426171 | 30.227401 | H | 4.993894   | -5.042703 | 18.367147 |
| O  | 1.815246   | -0.481984 | 21.674948 | H | 2.085711   | -2.780935 | 15.562639 |
| O  | 0.683425   | 0.421137  | 22.073003 | H | 0.642932   | -3.599833 | 16.186274 |
| O  | -6.388322  | 0.272042  | 19.902960 | H | 0.720053   | -1.834274 | 16.179017 |
| H  | -6.315488  | 0.730259  | 19.045025 | H | -0.710649  | -2.117303 | 17.967313 |
| H  | -6.969844  | -0.492174 | 19.696724 | H | -4.221795  | -1.051160 | 19.180419 |
| O  | -7.616059  | -2.016437 | 26.041140 | H | -4.498250  | -0.301115 | 21.315894 |
| H  | -7.183414  | -1.802703 | 25.175401 | H | -3.957965  | -0.771329 | 22.918339 |
| H  | -7.674857  | -2.989432 | 26.030250 | H | -4.543214  | -3.152653 | 22.381115 |
| O  | 1.626669   | 2.495282  | 26.939819 | H | -5.249421  | -2.595783 | 20.860055 |
| H  | 1.367720   | 2.316882  | 26.005294 | H | 5.246276   | -1.627817 | 17.596997 |
| H  | 1.238677   | 1.744493  | 27.424867 | H | 1.102457   | 0.987227  | 22.768251 |
| O  | -7.540591  | 2.439941  | 24.395871 | H | -11.208600 | 0.618662  | 25.103148 |
| H  | -6.669220  | 1.962599  | 24.380544 |   |            |           |           |

## State P<sub>M</sub>:

205

|   |           |           |           |   |            |           |           |
|---|-----------|-----------|-----------|---|------------|-----------|-----------|
| C | 0.705000  | 7.351000  | 24.202000 | H | -1.432532  | 1.378808  | 15.942901 |
| C | 1.114891  | 5.976922  | 23.732901 | H | -3.046146  | 1.189697  | 19.808220 |
| O | 1.646487  | 5.164416  | 24.512865 | H | 0.514860   | 1.395736  | 17.589536 |
| H | 1.616836  | 7.919649  | 24.402774 | C | -4.858459  | 4.000972  | 21.521458 |
| H | 0.146096  | 7.252151  | 25.133377 | C | -3.566318  | 3.329151  | 21.751534 |
| H | 0.108258  | 7.890391  | 23.460079 | N | -3.402010  | 2.341942  | 22.704693 |
| N | 0.904792  | 5.670254  | 22.439087 | C | -2.374443  | 3.389571  | 21.078011 |
| C | 1.490206  | 4.467710  | 21.869056 | C | -2.156792  | 1.841417  | 22.599193 |
| C | 1.333828  | 4.396971  | 20.350022 | N | -1.511976  | 2.459116  | 21.618995 |
| C | 2.217686  | 3.310086  | 19.857954 | H | -4.723054  | 4.859942  | 20.860043 |
| N | 1.868727  | 1.962981  | 19.936910 | H | -5.315434  | 4.337012  | 22.456282 |
| C | 3.533453  | 3.393508  | 19.508951 | H | -4.112650  | 1.989111  | 23.373623 |
| C | 2.939349  | 1.247175  | 19.648402 | H | -2.106688  | 3.992509  | 20.226832 |
| N | 3.994511  | 2.089237  | 19.378607 | H | -1.737236  | 1.063327  | 23.204262 |
| H | 0.564321  | 6.391667  | 21.814614 | C | -8.189953  | -4.012494 | 17.746401 |
| H | 1.034724  | 3.583988  | 22.311233 | C | -7.944064  | -3.098816 | 18.908397 |
| H | 0.292591  | 4.205353  | 20.078990 | O | -8.054359  | -1.875490 | 18.839646 |
| H | 1.643275  | 5.343775  | 19.892571 | O | -7.584988  | -3.745146 | 20.012970 |
| H | 4.173680  | 4.239459  | 19.335192 | H | -7.291581  | -4.611516 | 17.563872 |
| H | 3.011619  | 0.176938  | 19.668808 | H | -8.428862  | -3.425309 | 16.859557 |
| H | 2.557947  | 4.452159  | 22.114147 | C | -10.776387 | -3.278302 | 22.660305 |
| C | 8.778769  | 3.226685  | 19.822149 | C | -10.608442 | -1.980327 | 23.342781 |
| C | 7.699300  | 2.264536  | 19.441514 | N | -9.423468  | -1.272175 | 23.298727 |
| C | 8.022840  | 1.020314  | 18.847876 | C | -11.474222 | -1.226771 | 24.082983 |
| C | 6.343932  | 2.583108  | 19.615930 | C | -9.539703  | -0.136810 | 23.977840 |
| C | 7.052334  | 0.150784  | 18.438562 | N | -10.783084 | -0.095284 | 24.460336 |
| C | 5.340971  | 1.731825  | 19.204886 | H | -10.593941 | -3.169857 | 21.586363 |
| C | 5.651227  | 0.460876  | 18.559813 | H | -11.793640 | -3.645371 | 22.809887 |
| O | 4.749831  | -0.292810 | 18.113219 | H | -8.532054  | -1.629318 | 22.836198 |
| H | 8.561172  | 4.207344  | 19.381832 | H | -12.500117 | -1.393199 | 24.364741 |
| H | 9.742888  | 2.880171  | 19.441773 | H | -8.783631  | 0.622663  | 24.102040 |
| H | 9.069090  | 0.761893  | 18.714882 | C | -0.154657  | -7.332289 | 24.278004 |
| H | 6.089204  | 3.519423  | 20.096146 | C | 0.447243   | -6.317123 | 23.381740 |
| H | 7.304905  | -0.798129 | 17.976934 | N | 1.324702   | -6.642710 | 22.364603 |
| C | -4.047962 | 1.195509  | 16.887472 | C | 0.274365   | -4.959860 | 23.274539 |
| C | -2.752543 | 1.282827  | 17.618111 | C | 1.654640   | -5.523174 | 21.683922 |
| N | -1.540303 | 1.335869  | 16.951012 | N | 1.026536   | -4.486451 | 22.213750 |
| C | -2.410854 | 1.244022  | 18.946699 | H | -0.768378  | -8.035215 | 23.702166 |
| C | -0.529548 | 1.340777  | 17.843517 | H | -0.799617  | -6.831788 | 25.004235 |
| N | -1.030905 | 1.286030  | 19.071502 | H | 1.662746   | -7.576618 | 22.159492 |
| H | -4.630001 | 0.356191  | 17.269504 | H | -0.316340  | -4.298934 | 23.881981 |
| H | -3.857894 | 0.990833  | 15.830420 | H | 2.339047   | -5.488758 | 20.856815 |

|    |           |           |           |    |            |           |           |
|----|-----------|-----------|-----------|----|------------|-----------|-----------|
| C  | -7.280012 | -2.843020 | 29.428861 | C  | -3.210724  | -1.734915 | 18.694207 |
| N  | -6.219868 | -2.044451 | 30.010786 | C  | -3.979748  | -1.070153 | 21.645004 |
| C  | -5.506029 | -1.145908 | 29.334857 | C  | -4.922113  | -2.262811 | 21.825813 |
| N  | -5.689792 | -0.967639 | 28.035921 | C  | -6.172507  | -1.902566 | 22.595860 |
| N  | -4.617164 | -0.374103 | 29.980984 | O  | -7.294579  | -2.264668 | 22.101534 |
| H  | -6.884827 | -3.525192 | 28.669625 | O  | -6.062104  | -1.301308 | 23.693482 |
| H  | -8.034797 | -2.192200 | 28.979611 | C  | 4.363574   | -3.751549 | 17.062868 |
| H  | -5.952491 | -2.223838 | 30.970506 | O  | 5.505886   | -2.931229 | 17.370990 |
| H  | -6.384710 | -1.481799 | 27.496650 | C  | 4.781978   | -5.206354 | 17.193919 |
| H  | -5.200644 | -0.185702 | 27.584780 | H  | 5.634805   | -5.409811 | 16.536937 |
| H  | -4.354858 | -0.656922 | 30.915120 | Cu | 0.035722   | 1.442157  | 20.785587 |
| H  | -3.869700 | 0.071191  | 29.421293 | H  | 8.891071   | 3.392426  | 20.913366 |
| Fe | 1.453188  | -2.493953 | 21.708599 | H  | -4.673317  | 2.104936  | 16.938341 |
| C  | -1.438295 | -1.563992 | 23.282682 | H  | -5.531461  | 3.294704  | 21.032081 |
| C  | -0.199283 | -2.613666 | 18.729717 | H  | -9.006486  | -4.710145 | 17.956797 |
| C  | 4.340715  | -3.403712 | 20.134609 | H  | -10.071115 | -4.017670 | 23.050778 |
| C  | 3.112851  | -2.336014 | 24.669702 | H  | 0.595660   | -7.919073 | 24.825699 |
| N  | 0.932937  | -2.049001 | 23.592088 | H  | -7.746918  | -3.426168 | 30.227401 |
| C  | -0.306787 | -1.680632 | 24.053765 | O  | 1.877750   | -0.933101 | 21.363030 |
| C  | -0.260744 | -1.426175 | 25.476184 | O  | 0.707033   | 1.173151  | 22.540667 |
| C  | 1.041081  | -1.617015 | 25.862384 | O  | -6.373830  | 0.273574  | 19.709987 |
| C  | 1.768705  | -2.017886 | 24.674384 | H  | -6.220936  | 0.654916  | 18.827809 |
| C  | 1.658273  | -1.440199 | 27.196611 | H  | -6.933003  | -0.515284 | 19.520570 |
| O  | -2.977480 | -2.084351 | 17.533858 | O  | -7.542925  | -1.976442 | 25.952724 |
| C  | -1.423420 | -1.065529 | 26.324563 | H  | -7.095764  | -1.740959 | 25.100624 |
| C  | -1.996946 | 0.333669  | 26.082935 | H  | -7.802856  | -2.906734 | 25.829894 |
| C  | -2.930380 | 0.721543  | 27.213308 | O  | 1.257586   | 2.015517  | 27.246998 |
| O  | -2.503341 | 0.643318  | 28.386099 | H  | 0.969833   | 2.156451  | 26.302376 |
| O  | -4.124999 | 1.092046  | 26.912513 | H  | 0.603429   | 1.381235  | 27.589188 |
| N  | 1.942640  | -3.050210 | 19.835586 | O  | -7.521113  | 2.521121  | 24.072344 |
| C  | 1.126818  | -2.965821 | 18.733003 | H  | -6.665894  | 2.060069  | 24.273424 |
| C  | 1.892878  | -3.230608 | 17.527814 | H  | -7.459768  | 2.702496  | 23.115688 |
| C  | 3.184357  | -3.439470 | 17.922025 | O  | -5.147131  | 1.175546  | 24.490701 |
| C  | 3.207146  | -3.314637 | 19.368922 | H  | -4.719149  | 1.110338  | 25.402938 |
| C  | 1.306175  | -3.259151 | 16.166351 | H  | -5.381517  | 0.256714  | 24.220769 |
| N  | 3.337131  | -2.900139 | 22.308040 | O  | -4.636663  | 3.522346  | 28.182492 |
| C  | 4.402580  | -3.202127 | 21.499264 | H  | -4.458181  | 2.635143  | 27.778197 |
| C  | 5.624457  | -3.243405 | 22.264522 | H  | -4.451288  | 4.140580  | 27.450609 |
| C  | 5.278895  | -2.951394 | 23.567346 | O  | 0.409157   | 2.601531  | 24.726631 |
| C  | 3.837045  | -2.733256 | 23.569473 | H  | 0.891005   | 3.435163  | 24.533089 |
| C  | 6.962751  | -3.542125 | 21.707572 | H  | 0.541870   | 2.025949  | 23.911457 |
| C  | 6.115330  | -2.856559 | 24.736344 | H  | -7.437483  | -3.081087 | 20.790768 |
| C  | 7.418683  | -2.534145 | 24.743312 | H  | -2.532029  | 0.383086  | 25.139177 |
| N  | -0.458393 | -2.185505 | 21.122980 | H  | -1.185615  | 1.063345  | 26.035791 |
| C  | -0.931216 | -2.244396 | 19.841663 | H  | -1.129141  | -1.122467 | 27.373677 |
| C  | -2.317124 | -1.829309 | 19.817760 | H  | -2.225426  | -1.801962 | 26.179270 |
| C  | -2.664909 | -1.509754 | 21.122243 | H  | 2.239786   | -2.322799 | 27.484942 |
| C  | -1.496809 | -1.750585 | 21.920811 | H  | 2.332255   | -0.576630 | 27.186773 |

|   |           |           |           |   |            |           |           |
|---|-----------|-----------|-----------|---|------------|-----------|-----------|
| H | 0.899508  | -1.263364 | 27.961369 | H | 2.078662   | -3.386910 | 15.405939 |
| H | -2.348824 | -1.287327 | 23.788943 | H | 0.594351   | -4.088125 | 16.071753 |
| H | 3.639767  | -2.231539 | 25.606425 | H | 0.762468   | -2.331854 | 15.955925 |
| H | 5.629047  | -3.055499 | 25.689762 | H | -0.723497  | -2.585084 | 17.786115 |
| H | 7.973412  | -2.500410 | 25.676601 | H | -4.193584  | -1.304548 | 18.953319 |
| H | 7.947160  | -2.278007 | 23.833552 | H | -4.457931  | -0.356304 | 20.971193 |
| H | 7.596380  | -4.011018 | 22.465059 | H | -3.856101  | -0.576849 | 22.606532 |
| H | 6.892021  | -4.212435 | 20.846708 | H | -4.403466  | -3.039747 | 22.401184 |
| H | 7.458465  | -2.620343 | 21.376049 | H | -5.175956  | -2.685283 | 20.852950 |
| H | 5.264861  | -3.582322 | 19.609979 | H | 5.173572   | -2.026774 | 17.580059 |
| H | 4.069447  | -3.573070 | 16.019546 | H | 1.242924   | 0.359092  | 22.431562 |
| H | 3.946438  | -5.851999 | 16.907415 | H | -11.160387 | 0.666277  | 25.015813 |
| H | 5.059329  | -5.430848 | 18.227060 |   |            |           |           |

## State P<sub>R</sub>:

205

|   |          |          |           |   |           |           |           |
|---|----------|----------|-----------|---|-----------|-----------|-----------|
| C | 0.705000 | 7.351000 | 24.202000 | O | 4.718064  | -0.298273 | 17.995628 |
| C | 1.238108 | 6.046850 | 23.662821 | H | 8.689281  | 4.192348  | 19.348770 |
| O | 1.813009 | 5.237955 | 24.413580 | H | 9.799840  | 2.825539  | 19.502951 |
| H | 1.551123 | 7.934306 | 24.581655 | H | 9.073883  | 0.767223  | 18.615418 |
| H | 0.034016 | 7.130577 | 25.036831 | H | 6.105658  | 3.485549  | 20.052847 |
| H | 0.174970 | 7.939096 | 23.444135 | H | 7.314678  | -0.741937 | 17.821983 |
| N | 1.068277 | 5.790935 | 22.351368 | C | -3.970440 | 1.274576  | 16.760439 |
| C | 1.742242 | 4.657779 | 21.737231 | C | -2.690672 | 1.386702  | 17.511996 |
| C | 1.429777 | 4.499743 | 20.250640 | N | -1.473844 | 1.473244  | 16.858542 |
| C | 2.270047 | 3.381353 | 19.743908 | C | -2.363141 | 1.355744  | 18.844978 |
| N | 1.897607 | 2.049083 | 19.850465 | C | -0.472744 | 1.501097  | 17.761930 |
| C | 3.587977 | 3.426331 | 19.376671 | N | -0.987341 | 1.429819  | 18.983056 |
| C | 2.964024 | 1.304440 | 19.567118 | H | -4.470053 | 0.333972  | 17.006976 |
| N | 4.023173 | 2.113797 | 19.281365 | H | -3.763182 | 1.256884  | 15.685727 |
| H | 0.731591 | 6.536031 | 21.752266 | H | -1.358825 | 1.517974  | 15.851207 |
| H | 1.449934 | 3.743269 | 22.249860 | H | -3.005724 | 1.289430  | 19.700885 |
| H | 0.367032 | 4.288190 | 20.105295 | H | 0.572971  | 1.591452  | 17.524590 |
| H | 1.673059 | 5.421692 | 19.708827 | C | -4.866674 | 4.007664  | 21.522624 |
| H | 4.247992 | 4.254651 | 19.187563 | C | -3.559925 | 3.355171  | 21.727509 |
| H | 3.021891 | 0.232688 | 19.565547 | N | -3.368651 | 2.352293  | 22.660323 |
| H | 2.825611 | 4.778456 | 21.857377 | C | -2.374993 | 3.449718  | 21.045304 |
| C | 8.826550 | 3.212512 | 19.822600 | C | -2.115568 | 1.876366  | 22.532878 |
| C | 7.737231 | 2.261960 | 19.394328 | N | -1.491448 | 2.523961  | 21.559368 |
| C | 8.031899 | 1.046164 | 18.763312 | H | -4.755834 | 4.878143  | 20.870908 |
| C | 6.384625 | 2.565330 | 19.550829 | H | -5.320059 | 4.322983  | 22.467047 |
| C | 7.041311 | 0.188900 | 18.310393 | H | -4.069650 | 1.972254  | 23.323455 |
| C | 5.378686 | 1.718778 | 19.091314 | H | -2.121134 | 4.078497  | 20.207737 |
| C | 5.651867 | 0.473973 | 18.435533 | H | -1.675600 | 1.088127  | 23.110965 |

|    |            |           |           |    |            |           |           |
|----|------------|-----------|-----------|----|------------|-----------|-----------|
| C  | -8.240617  | -3.954680 | 17.751003 | C  | 1.070001   | -1.534489 | 25.921881 |
| C  | -7.955031  | -3.071732 | 18.929721 | C  | 1.795767   | -1.957118 | 24.737922 |
| O  | -7.870970  | -1.848587 | 18.842062 | C  | 1.696569   | -1.295729 | 27.243024 |
| O  | -7.765694  | -3.743273 | 20.062640 | O  | -2.970733  | -2.017218 | 17.606547 |
| H  | -7.317586  | -4.489546 | 17.495656 | C  | -1.397947  | -0.994278 | 26.382347 |
| H  | -8.539288  | -3.339260 | 16.901715 | C  | -1.897257  | 0.435221  | 26.146751 |
| C  | -10.808444 | -3.314563 | 22.656493 | C  | -2.892083  | 0.810180  | 27.226129 |
| C  | -10.666212 | -2.006141 | 23.322031 | O  | -2.506360  | 0.785668  | 28.418087 |
| N  | -9.474638  | -1.307042 | 23.328656 | O  | -4.093566  | 1.096888  | 26.873461 |
| C  | -11.561988 | -1.239766 | 24.010305 | N  | 1.953427   | -3.012916 | 19.900874 |
| C  | -9.617530  | -0.162111 | 23.987275 | C  | 1.129644   | -2.953023 | 18.803430 |
| N  | -10.882638 | -0.107599 | 24.407032 | C  | 1.895952   | -3.188682 | 17.593245 |
| H  | -10.646223 | -3.219271 | 21.578108 | C  | 3.200794   | -3.334226 | 17.977556 |
| H  | -11.809308 | -3.713729 | 22.832124 | C  | 3.222245   | -3.220697 | 19.422624 |
| H  | -8.568086  | -1.661217 | 22.894417 | C  | 1.301777   | -3.238609 | 16.235709 |
| H  | -12.600182 | -1.398905 | 24.248238 | N  | 3.360098   | -2.836363 | 22.371171 |
| H  | -8.863598  | 0.594605  | 24.138190 | C  | 4.425340   | -3.107780 | 21.549259 |
| C  | -0.139659  | -7.344196 | 24.246805 | C  | 5.654933   | -3.122972 | 22.308202 |
| C  | 0.479494   | -6.316808 | 23.377199 | C  | 5.314418   | -2.839127 | 23.612434 |
| N  | 1.360324   | -6.625229 | 22.357672 | C  | 3.867891   | -2.651789 | 23.627516 |
| C  | 0.315805   | -4.956299 | 23.299170 | C  | 6.992981   | -3.394741 | 21.736674 |
| C  | 1.699884   | -5.492140 | 21.702866 | C  | 6.162060   | -2.722294 | 24.774132 |
| N  | 1.074971   | -4.464335 | 22.254502 | C  | 7.460320   | -2.387270 | 24.768887 |
| H  | -0.718332  | -8.055253 | 23.645728 | N  | -0.454865  | -2.184161 | 21.200759 |
| H  | -0.821214  | -6.855050 | 24.946938 | C  | -0.926836  | -2.233537 | 19.918858 |
| H  | 1.690081   | -7.557298 | 22.131038 | C  | -2.307616  | -1.798218 | 19.894532 |
| H  | -0.274726  | -4.304312 | 23.917088 | C  | -2.655577  | -1.490902 | 21.202385 |
| H  | 2.382954   | -5.441888 | 20.875676 | C  | -1.492620  | -1.748742 | 21.998247 |
| C  | -7.283671  | -2.828229 | 29.436568 | C  | -3.191908  | -1.664473 | 18.768188 |
| N  | -6.167789  | -2.106070 | 30.015457 | C  | -3.972381  | -1.054170 | 21.724784 |
| C  | -5.417426  | -1.232329 | 29.334410 | C  | -4.938484  | -2.236372 | 21.842729 |
| N  | -5.696189  | -0.927354 | 28.075812 | C  | -6.185706  | -1.902913 | 22.632699 |
| N  | -4.388381  | -0.643002 | 29.941887 | O  | -7.309917  | -2.273680 | 22.151232 |
| H  | -6.954878  | -3.490950 | 28.629721 | O  | -6.063812  | -1.317305 | 23.738100 |
| H  | -8.021416  | -2.120711 | 29.050809 | C  | 4.396309   | -3.571223 | 17.111864 |
| H  | -5.756254  | -2.482461 | 30.861602 | O  | 5.510056   | -2.750957 | 17.458959 |
| H  | -6.382235  | -1.435106 | 27.518001 | C  | 4.835286   | -5.027358 | 17.183397 |
| H  | -5.173842  | -0.165352 | 27.627832 | H  | 5.696877   | -5.188105 | 16.525340 |
| H  | -4.251594  | -0.774178 | 30.935052 | Cu | 0.086633   | 1.590823  | 20.698543 |
| H  | -3.741107  | -0.032185 | 29.417365 | H  | 8.891071   | 3.392426  | 20.913366 |
| Fe | 1.470048   | -2.465376 | 21.773700 | H  | -4.673317  | 2.104936  | 16.938341 |
| C  | -1.427255  | -1.562004 | 23.364903 | H  | -5.531461  | 3.294704  | 21.032081 |
| C  | -0.201017  | -2.610057 | 18.806811 | H  | -9.006486  | -4.710145 | 17.956797 |
| C  | 4.364417   | -3.283238 | 20.185536 | H  | -10.071115 | -4.017670 | 23.050778 |
| C  | 3.144247   | -2.249029 | 24.728221 | H  | 0.595660   | -7.919073 | 24.825699 |
| N  | 0.950983   | -2.026577 | 23.663007 | H  | -7.746918  | -3.426168 | 30.227401 |
| C  | -0.292715  | -1.665890 | 24.125646 | O  | 1.876828   | -0.903581 | 21.416845 |
| C  | -0.235814  | -1.377892 | 25.543633 | O  | 0.756875   | 1.281814  | 22.455148 |

|   |           |           |           |   |            |           |           |
|---|-----------|-----------|-----------|---|------------|-----------|-----------|
| O | -6.293883 | 0.394006  | 19.800154 | H | 2.355759   | -0.422063 | 27.193374 |
| H | -6.119639 | 0.781348  | 18.923658 | H | 0.939830   | -1.098580 | 28.004082 |
| H | -6.806446 | -0.416360 | 19.586314 | H | -2.335611  | -1.280236 | 23.873592 |
| O | -7.553092 | -1.896526 | 26.004768 | H | 3.679796   | -2.113849 | 25.656996 |
| H | -7.095702 | -1.700145 | 25.147981 | H | 5.684979   | -2.918554 | 25.733146 |
| H | -7.777234 | -2.841909 | 25.933940 | H | 8.021399   | -2.336921 | 25.698511 |
| O | 1.293124  | 2.382601  | 27.304200 | H | 7.981780   | -2.131805 | 23.854151 |
| H | 1.097961  | 2.385284  | 26.326734 | H | 7.645798   | -3.845862 | 22.488925 |
| H | 0.509444  | 1.952130  | 27.688262 | H | 6.925943   | -4.070172 | 20.879970 |
| O | -7.522889 | 2.395483  | 24.082515 | H | 7.463624   | -2.464017 | 21.393594 |
| H | -6.644541 | 1.965416  | 24.252698 | H | 5.287510   | -3.404798 | 19.642430 |
| H | -7.495107 | 2.597270  | 23.128940 | H | 4.092216   | -3.361787 | 16.074557 |
| O | -5.084694 | 1.146447  | 24.438368 | H | 4.014427   | -5.678738 | 16.867223 |
| H | -4.666562 | 1.094890  | 25.354489 | H | 5.112478   | -5.284394 | 18.209801 |
| H | -5.338346 | 0.225572  | 24.192017 | H | 2.072934   | -3.356220 | 15.472383 |
| O | -4.865313 | 3.388503  | 28.299462 | H | 0.606145   | -4.082429 | 16.150728 |
| H | -4.583976 | 2.553372  | 27.843442 | H | 0.737049   | -2.324579 | 16.020835 |
| H | -4.529956 | 4.087673  | 27.705453 | H | -0.726326  | -2.583084 | 17.863960 |
| O | 0.719013  | 2.635969  | 24.666167 | H | -4.155962  | -1.192460 | 19.027100 |
| H | 1.144777  | 3.488441  | 24.437238 | H | -4.426218  | -0.301243 | 21.077461 |
| H | 0.728649  | 2.087212  | 23.814000 | H | -3.850797  | -0.605017 | 22.707542 |
| H | -7.535249 | -3.090084 | 20.826785 | H | -4.434926  | -3.050653 | 22.379953 |
| H | -2.355138 | 0.531751  | 25.166370 | H | -5.199573  | -2.608052 | 20.851261 |
| H | -1.048189 | 1.120710  | 26.182945 | H | 5.172612   | -1.814261 | 17.665079 |
| H | -1.125137 | -1.078420 | 27.436340 | H | 1.254791   | 0.443239  | 22.343642 |
| H | -2.228179 | -1.692392 | 26.210298 | H | -11.281489 | 0.661987  | 24.935574 |
| H | 2.295817  | -2.155004 | 27.562271 |   |            |           |           |

## State F:

206

|   |           |          |           |   |          |           |           |
|---|-----------|----------|-----------|---|----------|-----------|-----------|
| C | 0.705000  | 7.351000 | 24.202000 | H | 1.488012 | 3.880226  | 22.155212 |
| C | 1.184819  | 6.042240 | 23.640631 | H | 0.434366 | 4.525389  | 19.993639 |
| O | 1.602430  | 5.132995 | 24.372794 | H | 1.776421 | 5.634764  | 19.656857 |
| H | 1.549890  | 7.843414 | 24.694189 | H | 4.269827 | 4.416313  | 18.945299 |
| H | -0.057051 | 7.149251 | 24.960472 | H | 3.063842 | 0.424647  | 19.650513 |
| H | 0.293360  | 8.019435 | 23.442061 | H | 2.885513 | 4.890672  | 21.787330 |
| N | 1.133326  | 5.912008 | 22.295945 | C | 8.805507 | 3.353190  | 19.814687 |
| C | 1.799367  | 4.798671 | 21.657477 | C | 7.737978 | 2.406909  | 19.355626 |
| C | 1.500593  | 4.703162 | 20.163983 | C | 8.050489 | 1.158653  | 18.789351 |
| C | 2.323699  | 3.583050 | 19.648413 | C | 6.388792 | 2.739411  | 19.472207 |
| N | 1.962926  | 2.257782 | 19.871141 | C | 7.072014 | 0.288010  | 18.363048 |
| C | 3.616786  | 3.604195 | 19.212894 | C | 5.390556 | 1.887551  | 19.028963 |
| C | 3.002109  | 1.493396 | 19.568120 | C | 5.680953 | 0.602470  | 18.446140 |
| N | 4.043338  | 2.284807 | 19.168952 | O | 4.755430 | -0.171386 | 18.028755 |
| H | 0.953905  | 6.740921 | 21.740963 | H | 8.588919 | 4.371394  | 19.472000 |

|   |            |           |           |    |           |           |           |
|---|------------|-----------|-----------|----|-----------|-----------|-----------|
| H | 9.779407   | 3.053670  | 19.417376 | N  | 1.205656  | -4.335628 | 22.363988 |
| H | 9.095082   | 0.876146  | 18.686570 | H  | -0.734300 | -7.844551 | 23.656267 |
| H | 6.116404   | 3.684506  | 19.927548 | H  | -0.716558 | -6.737688 | 25.037535 |
| H | 7.339673   | -0.670408 | 17.931028 | H  | 1.858975  | -7.421096 | 22.272143 |
| C | -4.003414  | 1.240966  | 16.836963 | H  | -0.209214 | -4.186830 | 23.974615 |
| C | -2.705381  | 1.405713  | 17.540289 | H  | 2.570308  | -5.310227 | 21.034566 |
| N | -1.510036  | 1.486626  | 16.851125 | C  | -7.240112 | -2.911006 | 29.410094 |
| C | -2.343919  | 1.428831  | 18.863922 | N  | -6.157034 | -2.144487 | 29.988203 |
| C | -0.486261  | 1.561464  | 17.726090 | C  | -5.392813 | -1.300758 | 29.290320 |
| N | -0.966736  | 1.523528  | 18.961697 | N  | -5.615732 | -1.082165 | 28.004469 |
| H | -4.526810  | 0.360010  | 17.213630 | N  | -4.380891 | -0.684513 | 29.908293 |
| H | -3.825334  | 1.083781  | 15.769537 | H  | -6.870129 | -3.647406 | 28.689225 |
| H | -1.423421  | 1.501214  | 15.839902 | H  | -7.949574 | -2.241353 | 28.918848 |
| H | -2.963550  | 1.384298  | 19.738311 | H  | -5.784350 | -2.454546 | 30.877844 |
| H | 0.550854   | 1.655019  | 17.453665 | H  | -6.282891 | -1.623211 | 27.453461 |
| C | -4.875708  | 3.943054  | 21.622973 | H  | -5.118028 | -0.313015 | 27.542751 |
| C | -3.569266  | 3.275643  | 21.788451 | H  | -4.411416 | -0.609763 | 30.917258 |
| N | -3.427122  | 2.135152  | 22.550807 | H  | -3.799849 | -0.005689 | 29.390325 |
| C | -2.340191  | 3.488086  | 21.216630 | Fe | 1.534523  | -2.343938 | 21.802077 |
| C | -2.160374  | 1.694324  | 22.438640 | C  | -1.393370 | -1.541348 | 23.396273 |
| N | -1.472484  | 2.493917  | 21.631802 | C  | -0.118107 | -2.486812 | 18.830005 |
| H | -4.752841  | 4.888945  | 21.090605 | C  | 4.440636  | -3.160657 | 20.219820 |
| H | -5.352263  | 4.138415  | 22.587943 | C  | 3.234329  | -1.883875 | 24.705288 |
| H | -4.138830  | 1.731506  | 23.192324 | N  | 1.014734  | -1.854027 | 23.673010 |
| H | -2.040196  | 4.246139  | 20.512402 | C  | -0.244662 | -1.557059 | 24.144114 |
| H | -1.789171  | 0.802776  | 22.902370 | C  | -0.183281 | -1.204156 | 25.545513 |
| C | -8.602618  | -3.697032 | 17.825497 | C  | 1.137991  | -1.259463 | 25.905233 |
| C | -8.306983  | -3.025551 | 19.134468 | C  | 1.871235  | -1.682012 | 24.728778 |
| O | -8.766923  | -1.932605 | 19.455726 | C  | 1.760883  | -0.950381 | 27.212612 |
| O | -7.474909  | -3.719598 | 19.909809 | O  | -2.865033 | -1.911997 | 17.617155 |
| H | -7.666507  | -3.793835 | 17.264662 | C  | -1.357981 | -0.858175 | 26.382491 |
| H | -9.304733  | -3.089579 | 17.253797 | C  | -1.861499 | 0.577867  | 26.187409 |
| C | -10.676529 | -3.286116 | 22.504735 | C  | -2.938971 | 0.861361  | 27.215694 |
| C | -10.548576 | -1.958766 | 23.135868 | O  | -2.602875 | 0.878232  | 28.421530 |
| N | -9.338895  | -1.298723 | 23.189732 | O  | -4.148248 | 1.010372  | 26.810258 |
| C | -11.450744 | -1.143497 | 23.759909 | N  | 2.026174  | -2.924613 | 19.935121 |
| C | -9.478710  | -0.135554 | 23.820440 | C  | 1.211806  | -2.829948 | 18.831828 |
| N | -10.759848 | -0.023829 | 24.170496 | C  | 1.982845  | -3.051642 | 17.622990 |
| H | -10.323763 | -3.249364 | 21.470387 | C  | 3.278113  | -3.253485 | 18.014694 |
| H | -11.719618 | -3.607844 | 22.519335 | C  | 3.293982  | -3.148541 | 19.460614 |
| H | -8.443668  | -1.721170 | 22.829278 | C  | 1.405688  | -3.016321 | 16.258195 |
| H | -12.505964 | -1.263267 | 23.940013 | N  | 3.442960  | -2.607252 | 22.384971 |
| H | -8.710859  | 0.599319  | 23.994830 | C  | 4.508464  | -2.881000 | 21.564064 |
| C | -0.085673  | -7.232232 | 24.294661 | C  | 5.749963  | -2.765674 | 22.294780 |
| C | 0.587586   | -6.194643 | 23.471554 | C  | 5.414517  | -2.405659 | 23.580591 |
| N | 1.507130   | -6.493297 | 22.482889 | C  | 3.960809  | -2.303848 | 23.613848 |
| C | 0.414022   | -4.833815 | 23.383981 | C  | 7.092826  | -2.980367 | 21.713017 |
| C | 1.859828   | -5.360673 | 21.838350 | C  | 6.274124  | -2.157383 | 24.712952 |

|    |            |           |           |   |            |           |           |
|----|------------|-----------|-----------|---|------------|-----------|-----------|
| C  | 7.542247   | -1.726874 | 24.655139 | H | -5.423928  | 0.127236  | 24.145713 |
| N  | -0.403190  | -2.141994 | 21.233563 | O | -5.513337  | 2.767903  | 28.485003 |
| C  | -0.860740  | -2.158379 | 19.944460 | H | -5.008935  | 2.124092  | 27.925325 |
| C  | -2.248390  | -1.749976 | 19.919580 | H | -5.624981  | 3.533144  | 27.888501 |
| C  | -2.616139  | -1.491742 | 21.231008 | O | -9.501794  | 3.833705  | 25.514309 |
| C  | -1.456101  | -1.747023 | 22.031819 | H | -8.747170  | 3.321961  | 25.128821 |
| C  | -3.119347  | -1.609055 | 18.782943 | H | -9.194497  | 4.056368  | 26.415016 |
| C  | -3.944313  | -1.107009 | 21.759858 | H | -7.339809  | -3.208563 | 20.798947 |
| C  | -4.859131  | -2.326335 | 21.846329 | H | -2.245554  | 0.724670  | 25.180474 |
| C  | -6.115856  | -2.067712 | 22.642016 | H | -1.026348  | 1.268822  | 26.346928 |
| O  | -7.207012  | -2.549473 | 22.190550 | H | -1.097864  | -0.976904 | 27.436713 |
| O  | -6.037384  | -1.438932 | 23.727258 | H | -2.179196  | -1.556011 | 26.175225 |
| C  | 4.468758   | -3.513138 | 17.149525 | H | 2.356468   | -1.795335 | 27.574029 |
| O  | 5.585929   | -2.678008 | 17.470748 | H | 2.431074   | -0.087269 | 27.123068 |
| C  | 4.922652   | -4.959712 | 17.256565 | H | 1.001356   | -0.714728 | 27.960098 |
| H  | 5.780118   | -5.125782 | 16.595100 | H | -2.311511  | -1.301041 | 23.910853 |
| Cu | 0.150194   | 1.861430  | 20.632302 | H | 3.776285   | -1.669841 | 25.614926 |
| H  | 8.891071   | 3.392424  | 20.913364 | H | 5.833348   | -2.333193 | 25.693069 |
| H  | -4.673318  | 2.104938  | 16.938342 | H | 8.118256   | -1.584586 | 25.565736 |
| H  | -5.531461  | 3.294704  | 21.032082 | H | 8.023387   | -1.486108 | 23.714675 |
| H  | -9.006489  | -4.710142 | 17.956797 | H | 7.793867   | -3.315208 | 22.481911 |
| H  | -10.071117 | -4.017669 | 23.050779 | H | 7.064726   | -3.725778 | 20.914112 |
| H  | 0.595657   | -7.919074 | 24.825695 | H | 7.477961   | -2.045091 | 21.286554 |
| H  | -7.746917  | -3.426173 | 30.227402 | H | 5.364672   | -3.297042 | 19.683121 |
| O  | 1.873711   | -0.770847 | 21.382366 | H | 4.163721   | -3.327794 | 16.109441 |
| O  | 1.124997   | 1.311717  | 22.593461 | H | 4.106038   | -5.626517 | 16.964030 |
| O  | -7.080768  | 0.276423  | 20.646003 | H | 5.212672   | -5.186985 | 18.286002 |
| H  | -7.023114  | 0.712561  | 19.776350 | H | 2.188811   | -3.054148 | 15.498853 |
| H  | -7.577637  | -0.540064 | 20.440888 | H | 0.730713   | -3.865639 | 16.098174 |
| O  | -7.428536  | -2.228624 | 25.964337 | H | 0.825586   | -2.099444 | 16.108527 |
| H  | -7.005064  | -1.944722 | 25.113600 | H | -0.632082  | -2.430134 | 17.882487 |
| H  | -7.365889  | -3.201685 | 25.928888 | H | -4.106340  | -1.180828 | 19.039188 |
| O  | -11.581697 | 2.054778  | 25.820277 | H | -4.420978  | -0.346750 | 21.138093 |
| H  | -10.849942 | 2.722038  | 25.700285 | H | -3.844315  | -0.684391 | 22.755827 |
| H  | -12.383759 | 2.519958  | 25.508405 | H | -4.320863  | -3.132803 | 22.360523 |
| O  | -7.509137  | 2.421676  | 24.182677 | H | -5.103381  | -2.683729 | 20.845985 |
| H  | -6.643300  | 1.953775  | 24.341031 | H | 5.238261   | -1.760162 | 17.661479 |
| H  | -7.405085  | 2.820968  | 23.300784 | H | 0.473295   | 1.031752  | 23.261818 |
| O  | -5.156399  | 1.051364  | 24.375771 | H | 1.474256   | 0.425092  | 22.227302 |
| H  | -4.717810  | 1.007704  | 25.281178 | H | -11.145958 | 0.770019  | 24.725670 |

## State F<sub>H</sub>:

206

|   |          |          |           |   |          |          |           |
|---|----------|----------|-----------|---|----------|----------|-----------|
| C | 0.705000 | 7.351000 | 24.202000 | O | 1.480070 | 5.112108 | 24.617832 |
| C | 1.023715 | 5.932082 | 23.805188 | H | 1.572242 | 7.764781 | 24.725604 |



|   |           |           |           |    |            |           |           |
|---|-----------|-----------|-----------|----|------------|-----------|-----------|
| H | -0.136262 | 7.335770  | 24.902717 | H  | -5.058608  | 4.141525  | 22.517883 |
| H | 0.451590  | 7.988622  | 23.351575 | H  | -4.147600  | 1.606171  | 23.230456 |
| N | 0.781820  | 5.600929  | 22.520696 | H  | -1.904542  | 3.672289  | 20.301077 |
| C | 1.159612  | 4.307209  | 21.982475 | H  | -1.845383  | 0.528474  | 23.073595 |
| C | 1.270089  | 4.363433  | 20.458047 | C  | -8.432214  | -3.788444 | 17.792476 |
| C | 2.179374  | 3.301821  | 19.969076 | C  | -8.118755  | -3.083041 | 19.078108 |
| N | 1.863468  | 1.941077  | 19.985782 | O  | -8.292833  | -1.877795 | 19.247265 |
| C | 3.484586  | 3.434768  | 19.606098 | O  | -7.612534  | -3.885084 | 20.011492 |
| C | 2.943942  | 1.274731  | 19.618397 | H  | -7.487527  | -4.072991 | 17.315069 |
| N | 3.970423  | 2.150272  | 19.384292 | H  | -8.976807  | -3.115025 | 17.130037 |
| H | 0.434056  | 6.309428  | 21.887223 | C  | -10.782326 | -3.324528 | 22.584870 |
| H | 0.437213  | 3.542559  | 22.279505 | C  | -10.643603 | -1.966710 | 23.151218 |
| H | 0.282323  | 4.281752  | 19.997879 | N  | -9.443521  | -1.288013 | 23.115145 |
| H | 1.699586  | 5.328749  | 20.168968 | C  | -11.532364 | -1.125174 | 23.761714 |
| H | 4.100215  | 4.305669  | 19.473159 | C  | -9.573754  | -0.091266 | 23.680459 |
| H | 3.047004  | 0.210706  | 19.550883 | N  | -10.841228 | 0.025321  | 24.076602 |
| H | 2.131138  | 4.040701  | 22.404629 | H  | -10.578071 | -3.308170 | 21.509553 |
| C | 8.695212  | 3.425401  | 19.831849 | H  | -11.798037 | -3.691926 | 22.744813 |
| C | 7.655620  | 2.431107  | 19.430501 | H  | -8.550247  | -1.737661 | 22.773680 |
| C | 8.009403  | 1.183260  | 18.878155 | H  | -12.578587 | -1.242182 | 23.990945 |
| C | 6.301794  | 2.714769  | 19.603377 | H  | -8.806257  | 0.656872  | 23.795360 |
| C | 7.055466  | 0.281931  | 18.478488 | C  | -0.038700  | -7.279549 | 24.177556 |
| C | 5.320352  | 1.828056  | 19.199049 | C  | 0.632897   | -6.210467 | 23.380013 |
| C | 5.657002  | 0.568929  | 18.571760 | N  | 1.603579   | -6.449140 | 22.421984 |
| O | 4.757639  | -0.203709 | 18.116425 | C  | 0.361220   | -4.866598 | 23.260598 |
| H | 8.366653  | 4.442329  | 19.592179 | C  | 1.887879   | -5.298490 | 21.770099 |
| H | 9.638788  | 3.227886  | 19.315911 | N  | 1.141790   | -4.318032 | 22.256101 |
| H | 9.062056  | 0.940882  | 18.762647 | H  | -0.575901  | -7.949970 | 23.495355 |
| H | 6.022929  | 3.648468  | 20.074190 | H  | -0.782798  | -6.801360 | 24.820738 |
| H | 7.339580  | -0.670682 | 18.044567 | H  | 2.029950   | -7.349387 | 22.230398 |
| C | -4.141363 | 1.153620  | 16.811701 | H  | -0.333006  | -4.267461 | 23.819883 |
| C | -2.817514 | 1.127797  | 17.479451 | H  | 2.622676   | -5.204328 | 20.991150 |
| N | -1.636010 | 1.040761  | 16.769373 | C  | -7.301585  | -2.884940 | 29.397883 |
| C | -2.437342 | 1.063959  | 18.795902 | N  | -6.293644  | -2.023450 | 29.971397 |
| C | -0.600430 | 0.936632  | 17.631310 | C  | -5.564457  | -1.167445 | 29.263525 |
| N | -1.062363 | 0.945596  | 18.873373 | N  | -5.658879  | -1.144770 | 27.936125 |
| H | -4.776540 | 0.358037  | 17.210920 | N  | -4.730726  | -0.335082 | 29.894179 |
| H | -4.020937 | 0.974817  | 15.739561 | H  | -6.852183  | -3.594726 | 28.697467 |
| H | -1.564016 | 1.057672  | 15.757630 | H  | -8.075548  | -2.301769 | 28.891164 |
| H | -3.046807 | 1.084233  | 19.677977 | H  | -6.212684  | -1.981771 | 30.980048 |
| H | 0.433722  | 0.870228  | 17.339037 | H  | -6.461607  | -1.554156 | 27.457524 |
| C | -4.698739 | 3.810557  | 21.537061 | H  | -5.207082  | -0.354883 | 27.462947 |
| C | -3.480795 | 2.973612  | 21.688337 | H  | -4.493108  | -0.562071 | 30.852771 |
| N | -3.405316 | 1.916553  | 22.576106 | H  | -3.994882  | 0.146655  | 29.344652 |
| C | -2.245921 | 3.019670  | 21.086339 | Fe | 1.336903   | -2.247297 | 21.726106 |
| C | -2.176148 | 1.369155  | 22.498882 | C  | -1.620340  | -1.780759 | 23.331768 |
| N | -1.443829 | 2.006075  | 21.592186 | C  | -0.260361  | -2.323687 | 18.720151 |
| H | -4.453471 | 4.699051  | 20.948475 | C  | 4.292650   | -2.952978 | 20.137148 |

|    |            |           |           |   |            |           |           |
|----|------------|-----------|-----------|---|------------|-----------|-----------|
| C  | 3.006751   | -1.880174 | 24.660003 | H | 0.595655   | -7.919076 | 24.825693 |
| N  | 0.794385   | -1.940979 | 23.621247 | H | -7.746918  | -3.426175 | 30.227400 |
| C  | -0.481293  | -1.758798 | 24.094393 | O | 1.450335   | -0.595616 | 21.450284 |
| C  | -0.448712  | -1.478780 | 25.515025 | O | 3.922631   | 0.611048  | 22.251077 |
| C  | 0.870563   | -1.462401 | 25.880342 | O | -6.948689  | 0.292124  | 20.817431 |
| C  | 1.634404   | -1.774076 | 24.688144 | H | -6.876123  | 0.875652  | 20.038420 |
| C  | 1.475147   | -1.149184 | 27.195862 | H | -7.363885  | -0.513212 | 20.444146 |
| O  | -3.049009  | -2.031874 | 17.537459 | O | -7.776755  | -1.870122 | 25.964293 |
| C  | -1.633856  | -1.137899 | 26.337197 | H | -7.264286  | -1.767141 | 25.120797 |
| C  | -2.060442  | 0.322311  | 26.131513 | H | -8.100955  | -2.789404 | 25.916653 |
| C  | -3.055745  | 0.729018  | 27.193301 | O | -11.696873 | 2.280226  | 25.475239 |
| O  | -2.673869  | 0.719517  | 28.385553 | H | -10.854878 | 2.803277  | 25.575347 |
| O  | -4.254701  | 1.014906  | 26.831384 | H | -12.255740 | 2.840373  | 24.901334 |
| N  | 1.887862   | -2.686144 | 19.830258 | O | -7.549728  | 2.424390  | 24.083622 |
| C  | 1.088277   | -2.575123 | 18.717666 | H | -6.708912  | 1.921167  | 24.261242 |
| C  | 1.871804   | -2.768918 | 17.513238 | H | -7.386772  | 2.875698  | 23.235599 |
| C  | 3.155605   | -3.019462 | 17.917000 | O | -5.263048  | 0.975156  | 24.397595 |
| C  | 3.157264   | -2.927867 | 19.364528 | H | -4.837619  | 0.954740  | 25.309490 |
| C  | 1.311416   | -2.691161 | 16.142849 | H | -5.518271  | 0.046676  | 24.179941 |
| N  | 3.256337   | -2.442361 | 22.299450 | O | -5.488283  | 2.833105  | 28.523582 |
| C  | 4.337460   | -2.685067 | 21.484862 | H | -5.029660  | 2.156690  | 27.960866 |
| C  | 5.567171   | -2.565932 | 22.230543 | H | -5.768602  | 3.506315  | 27.876574 |
| C  | 5.211626   | -2.248787 | 23.525427 | O | -9.329615  | 3.684572  | 25.799826 |
| C  | 3.756733   | -2.194323 | 23.550534 | H | -8.651248  | 3.230042  | 25.237211 |
| C  | 6.918404   | -2.772624 | 21.662587 | H | -9.046723  | 3.487084  | 26.714500 |
| C  | 6.057496   | -2.017605 | 24.671193 | H | -7.459829  | -3.337333 | 20.877186 |
| C  | 7.328850   | -1.594237 | 24.632545 | H | -2.484245  | 0.463665  | 25.141740 |
| N  | -0.582430  | -2.186020 | 21.142930 | H | -1.174847  | 0.960575  | 26.222485 |
| C  | -1.029967  | -2.152175 | 19.849734 | H | -1.398471  | -1.278005 | 27.394937 |
| C  | -2.438558  | -1.832517 | 19.837387 | H | -2.474688  | -1.801249 | 26.101721 |
| C  | -2.817756  | -1.639592 | 21.156749 | H | 2.071168   | -1.990578 | 27.566945 |
| C  | -1.655586  | -1.894640 | 21.954915 | H | 2.143474   | -0.284274 | 27.109932 |
| C  | -3.313541  | -1.721985 | 18.699041 | H | 0.706497   | -0.914366 | 27.934432 |
| C  | -4.140636  | -1.285643 | 21.706327 | H | -2.558765  | -1.622710 | 23.842754 |
| C  | -4.986209  | -2.535924 | 21.932938 | H | 3.532828   | -1.684325 | 25.582760 |
| C  | -6.238274  | -2.213079 | 22.710423 | H | 5.606150   | -2.205531 | 25.643492 |
| O  | -7.348406  | -2.633333 | 22.241085 | H | 7.895909   | -1.469228 | 25.551191 |
| O  | -6.135569  | -1.568038 | 23.783556 | H | 7.823159   | -1.344261 | 23.701291 |
| C  | 4.327169   | -3.378032 | 17.060384 | H | 7.599836   | -3.149384 | 22.429831 |
| O  | 5.526344   | -2.675877 | 17.406322 | H | 6.892638   | -3.487537 | 20.836332 |
| C  | 4.619970   | -4.865936 | 17.154686 | H | 7.328618   | -1.831481 | 21.277035 |
| H  | 5.458787   | -5.118853 | 16.496654 | H | 5.222481   | -3.099779 | 19.612496 |
| Cu | 0.094909   | 1.154519  | 20.533025 | H | 4.058133   | -3.144918 | 16.020079 |
| H  | 8.891071   | 3.392424  | 20.913364 | H | 3.737512   | -5.437748 | 16.853796 |
| H  | -4.673318  | 2.104939  | 16.938341 | H | 4.877091   | -5.125390 | 18.185634 |
| H  | -5.531461  | 3.294704  | 21.032081 | H | 2.104956   | -2.686131 | 15.393122 |
| H  | -9.006489  | -4.710141 | 17.956794 | H | 0.651902   | -3.543354 | 15.938605 |
| H  | -10.071117 | -4.017669 | 23.050777 | H | 0.717383   | -1.779334 | 16.021616 |

|   |           |           |           |   |            |           |           |
|---|-----------|-----------|-----------|---|------------|-----------|-----------|
| H | -0.774895 | -2.241703 | 17.775579 | H | -5.227599  | -3.004381 | 20.977596 |
| H | -4.314582 | -1.325407 | 18.951660 | H | 5.256224   | -1.743227 | 17.634605 |
| H | -4.683530 | -0.596360 | 21.057946 | H | 3.058771   | 0.202902  | 22.013367 |
| H | -4.020585 | -0.782799 | 22.662441 | H | 4.503561   | -0.167593 | 22.326272 |
| H | -4.405269 | -3.255816 | 22.521945 | H | -11.222372 | 0.861493  | 24.569043 |

## State O<sub>H</sub>:

207

|   |           |           |           |   |            |           |           |
|---|-----------|-----------|-----------|---|------------|-----------|-----------|
| C | 0.705000  | 7.351000  | 24.202000 | C | -2.310838  | 1.429785  | 18.442537 |
| C | 0.979451  | 5.923930  | 23.788906 | C | -0.386495  | 1.576287  | 17.420626 |
| O | 1.324551  | 5.059450  | 24.610748 | N | -0.939604  | 1.410736  | 18.615349 |
| H | 1.664886  | 7.827961  | 24.427409 | H | -4.165259  | 0.637172  | 16.069245 |
| H | 0.101843  | 7.343949  | 25.112688 | H | -3.740260  | 2.241072  | 15.437238 |
| H | 0.196813  | 7.927093  | 23.424393 | H | -1.218462  | 1.838804  | 15.503021 |
| N | 0.853346  | 5.640379  | 22.475180 | H | -2.978948  | 1.321853  | 19.274869 |
| C | 1.292722  | 4.364695  | 21.932818 | H | 0.667905   | 1.635500  | 17.213664 |
| C | 1.321641  | 4.405794  | 20.404551 | C | -4.719743  | 3.850719  | 21.524856 |
| C | 2.230010  | 3.365033  | 19.863277 | C | -3.467604  | 3.063152  | 21.631400 |
| N | 1.873861  | 2.035194  | 19.694364 | N | -3.304794  | 2.039791  | 22.547471 |
| C | 3.564242  | 3.485575  | 19.588772 | C | -2.279863  | 3.118920  | 20.943987 |
| C | 2.953371  | 1.365515  | 19.315421 | C | -2.075027  | 1.510514  | 22.394962 |
| N | 4.021090  | 2.220428  | 19.250329 | N | -1.425058  | 2.136635  | 21.419921 |
| H | 0.657529  | 6.395927  | 21.829755 | H | -4.533465  | 4.753498  | 20.937142 |
| H | 0.623483  | 3.569533  | 22.272131 | H | -5.071083  | 4.152947  | 22.516728 |
| H | 0.313606  | 4.284513  | 20.002202 | H | -4.028346  | 1.687478  | 23.200828 |
| H | 1.700194  | 5.381535  | 20.082292 | H | -2.006722  | 3.756188  | 20.120850 |
| H | 4.214874  | 4.340928  | 19.593654 | H | -1.686879  | 0.696906  | 22.973586 |
| H | 3.032359  | 0.313694  | 19.118019 | C | -8.428293  | -3.782928 | 17.849124 |
| H | 2.298341  | 4.151231  | 22.310589 | C | -8.234138  | -3.107412 | 19.172932 |
| C | 8.803795  | 3.331376  | 19.819527 | O | -8.607561  | -1.958699 | 19.408550 |
| C | 7.728450  | 2.394216  | 19.355726 | O | -7.606040  | -3.870808 | 20.060829 |
| C | 8.040877  | 1.230824  | 18.637947 | H | -7.449331  | -4.058579 | 17.442764 |
| C | 6.378556  | 2.674956  | 19.568233 | H | -8.935291  | -3.107888 | 17.159375 |
| C | 7.059798  | 0.408412  | 18.126512 | C | -10.901862 | -3.363832 | 22.767709 |
| C | 5.378125  | 1.872544  | 19.037243 | C | -10.708616 | -2.017595 | 23.342103 |
| C | 5.674086  | 0.704612  | 18.256933 | N | -9.508559  | -1.352808 | 23.204605 |
| O | 4.752593  | -0.001991 | 17.711107 | C | -11.533317 | -1.166254 | 24.023656 |
| H | 8.604788  | 4.347530  | 19.457338 | C | -9.576337  | -0.154675 | 23.776723 |
| H | 9.774133  | 3.015508  | 19.425755 | N | -10.804162 | -0.022414 | 24.276444 |
| H | 9.085675  | 0.980568  | 18.469426 | H | -10.923848 | -3.307463 | 21.673597 |
| H | 6.111514  | 3.546958  | 20.153243 | H | -11.839902 | -3.797740 | 23.119492 |
| H | 7.326193  | -0.477833 | 17.559437 | H | -8.640996  | -1.818862 | 22.833975 |
| C | -3.864760 | 1.652799  | 16.351671 | H | -12.558421 | -1.271904 | 24.337032 |
| C | -2.596434 | 1.612217  | 17.115235 | H | -8.789508  | 0.579189  | 23.816876 |
| N | -1.362747 | 1.691256  | 16.496354 | C | -0.089421  | -7.237526 | 24.284150 |

|    |           |           |           |    |            |           |           |
|----|-----------|-----------|-----------|----|------------|-----------|-----------|
| C  | 0.525632  | -6.150714 | 23.466094 | C  | 4.969342   | -1.854100 | 23.689723 |
| N  | 1.415696  | -6.372528 | 22.429621 | C  | 3.511902   | -1.852664 | 23.678669 |
| C  | 0.257342  | -4.799316 | 23.397281 | C  | 6.750463   | -2.234528 | 21.853657 |
| C  | 1.653509  | -5.199196 | 21.788178 | C  | 5.778238   | -1.620073 | 24.858820 |
| N  | 0.957673  | -4.225210 | 22.350378 | C  | 7.052586   | -1.202306 | 24.866699 |
| H  | -0.716264 | -7.864925 | 23.637690 | N  | -0.821908  | -1.904952 | 21.068165 |
| H  | -0.744920 | -6.774519 | 25.027035 | C  | -1.212042  | -1.819851 | 19.760363 |
| H  | 1.821855  | -7.270344 | 22.187954 | C  | -2.628929  | -1.523637 | 19.715837 |
| H  | -0.386652 | -4.207400 | 24.024864 | C  | -3.054714  | -1.405804 | 21.033574 |
| H  | 2.327663  | -5.091151 | 20.954931 | C  | -1.911930  | -1.668916 | 21.867661 |
| C  | -7.222564 | -2.956882 | 29.396578 | C  | -3.487575  | -1.434690 | 18.558883 |
| N  | -6.318461 | -1.983473 | 29.970256 | C  | -4.404436  | -1.139736 | 21.559756 |
| C  | -5.564198 | -1.164694 | 29.238733 | C  | -5.090184  | -2.455654 | 21.922689 |
| N  | -5.668460 | -1.160780 | 27.912557 | C  | -6.324262  | -2.220072 | 22.754616 |
| N  | -4.667714 | -0.383252 | 29.840240 | O  | -7.420962  | -2.742087 | 22.359953 |
| H  | -6.681471 | -3.716152 | 28.822131 | O  | -6.214523  | -1.540807 | 23.805076 |
| H  | -7.954606 | -2.460964 | 28.755891 | C  | 4.257660   | -3.194985 | 17.187986 |
| H  | -6.047582 | -2.108888 | 30.938525 | O  | 5.463389   | -2.518843 | 17.538327 |
| H  | -6.456917 | -1.618672 | 27.458070 | C  | 4.472721   | -4.685699 | 17.398390 |
| H  | -5.288704 | -0.343527 | 27.422073 | H  | 5.314996   | -5.026435 | 16.786266 |
| H  | -4.697209 | -0.297392 | 30.847767 | Cu | 0.093317   | 1.241482  | 20.325924 |
| H  | -4.153340 | 0.335768  | 29.308774 | H  | 8.891071   | 3.392425  | 20.913366 |
| Fe | 1.132747  | -1.879785 | 21.749477 | H  | -4.673318  | 2.104938  | 16.938342 |
| C  | -1.903714 | -1.577241 | 23.258224 | H  | -5.531462  | 3.294703  | 21.032083 |
| C  | -0.373299 | -1.962533 | 18.663937 | H  | -9.006487  | -4.710142 | 17.956797 |
| C  | 4.150550  | -2.564329 | 20.249359 | H  | -10.071117 | -4.017669 | 23.050776 |
| C  | 2.688187  | -1.596626 | 24.766110 | H  | 0.595659   | -7.919075 | 24.825694 |
| N  | 0.488155  | -1.737079 | 23.702319 | H  | -7.746920  | -3.426171 | 30.227401 |
| C  | -0.805641 | -1.545497 | 24.100685 | O  | 1.072470   | 0.096151  | 21.624125 |
| C  | -0.823656 | -1.208369 | 25.515055 | O  | 3.875207   | 0.993678  | 22.214402 |
| C  | 0.486398  | -1.187555 | 25.932151 | O  | -7.504958  | 0.145916  | 21.044148 |
| C  | 1.299917  | -1.528671 | 24.778419 | H  | -7.282424  | 0.746445  | 20.308767 |
| C  | 1.028061  | -0.831806 | 27.263351 | H  | -7.839962  | -0.651984 | 20.577557 |
| O  | -3.179588 | -1.721760 | 17.402930 | O  | -7.829700  | -1.752447 | 25.993099 |
| C  | -2.016994 | -0.800145 | 26.296054 | H  | -7.324980  | -1.690190 | 25.141085 |
| C  | -2.254628 | 0.716837  | 26.187230 | H  | -8.491459  | -2.449107 | 25.816213 |
| C  | -3.343146 | 1.111995  | 27.159643 | O  | -11.388441 | 2.299741  | 25.705964 |
| O  | -3.033374 | 1.327250  | 28.351872 | H  | -10.459013 | 2.606689  | 25.899156 |
| O  | -4.555135 | 1.106512  | 26.727565 | H  | -11.719435 | 2.958413  | 25.060045 |
| N  | 1.760161  | -2.293648 | 19.823621 | O  | -7.487352  | 2.366302  | 23.854067 |
| C  | 0.984999  | -2.221615 | 18.691827 | H  | -6.634607  | 1.870363  | 23.994114 |
| C  | 1.807687  | -2.479005 | 17.524045 | H  | -7.416099  | 2.751192  | 22.963909 |
| C  | 3.076823  | -2.736900 | 17.981370 | O  | -5.206525  | 0.965310  | 24.229131 |
| C  | 3.043268  | -2.575268 | 19.422087 | H  | -4.913437  | 0.990900  | 25.198388 |
| C  | 1.300062  | -2.471021 | 16.131829 | H  | -5.510203  | 0.040616  | 24.058349 |
| N  | 3.074779  | -2.090301 | 22.402377 | O  | -6.529101  | 2.643073  | 27.941874 |
| C  | 4.176789  | -2.292448 | 21.608239 | H  | -5.800151  | 2.096412  | 27.547961 |
| C  | 5.375606  | -2.134060 | 22.390287 | H  | -6.204241  | 3.559229  | 27.837824 |

|   |           |           |           |   |            |           |           |
|---|-----------|-----------|-----------|---|------------|-----------|-----------|
| O | -8.808901 | 3.217421  | 26.120179 | H | 5.095024   | -2.708017 | 19.747398 |
| H | -8.347082 | 2.981827  | 25.276300 | H | 4.032988   | -3.025928 | 16.124642 |
| H | -8.164575 | 2.920645  | 26.803074 | H | 3.571199   | -5.235785 | 17.114308 |
| H | -7.519071 | -3.363720 | 20.961862 | H | 4.688928   | -4.879565 | 18.452960 |
| H | -2.531647 | 0.975884  | 25.167040 | H | 2.120922   | -2.497360 | 15.412749 |
| H | -1.327636 | 1.235295  | 26.446022 | H | 0.654027   | -3.338065 | 15.946817 |
| H | -1.868447 | -1.052820 | 27.350371 | H | 0.704428   | -1.571286 | 15.945442 |
| H | -2.909508 | -1.336481 | 25.957929 | H | -0.850773  | -1.875673 | 17.698846 |
| H | 1.654453  | -1.639693 | 27.659001 | H | -4.512515  | -1.085807 | 18.785391 |
| H | 1.654719  | 0.065150  | 27.191489 | H | -5.024837  | -0.583411 | 20.856661 |
| H | 0.225308  | -0.632254 | 27.975385 | H | -4.321823  | -0.531734 | 22.455991 |
| H | -2.862919 | -1.400938 | 23.725688 | H | -4.400326  | -3.057638 | 22.525011 |
| H | 3.182830  | -1.400266 | 25.707774 | H | -5.319827  | -3.017796 | 21.016623 |
| H | 5.290282  | -1.797771 | 25.814996 | H | 5.224734   | -1.540338 | 17.568834 |
| H | 7.579528  | -1.069378 | 25.807592 | H | 4.267505   | 0.171131  | 22.563936 |
| H | 7.587867  | -0.962017 | 23.957045 | H | 1.979835   | 0.448839  | 21.743343 |
| H | 7.427934  | -2.655406 | 22.601500 | H | 4.389484   | 1.166901  | 21.405770 |
| H | 6.781141  | -2.861825 | 20.960107 | H | -11.124053 | 0.824296  | 24.793069 |
| H | 7.128272  | -1.242729 | 21.575007 |   |            |           |           |
